# Discovering the 3' UTR-mediated regulation of alpha-synuclein

Domenica Marchese<sup>1,2</sup>, Teresa Botta-Orfila<sup>1,2</sup>, Davide Cirillo<sup>1,2,3</sup>, Juan Antonio Rodriguez<sup>2,4</sup>, Carmen Maria Livi<sup>1,2,5</sup>, Rubén Fernández-Santiago<sup>6,7</sup>, Mario Ezquerra<sup>6,7</sup>, Maria J. Marti<sup>6,7</sup>, Elias Bechara<sup>1,2</sup> and Gian Gaetano Tartaglia<sup>1,2,8,\*</sup>†

<sup>1</sup>Centre for Genomic Regulation (CRG), The Barcelona Institute for Science and Technology, Dr. Aiguader 88, 08003 Barcelona, Spain, <sup>2</sup>Universitat Pompeu Fabra (UPF), Barcelona, Spain, <sup>3</sup>Barcelona Supercomputing Center (BSC), Torre Girona c/Jordi Girona, 29, 08034 Barcelona, Spain, <sup>4</sup>Centro Nacional de Análisis Genómico, c/BaldiriReixac, 4, 08028 Barcelona, Spain, <sup>5</sup>IFOM, the FIRC Institute of Molecular Oncology, Via Adamello 16, 20139 Milan, Italy, <sup>6</sup>Institut d'Investigacions Biomèdiques August Pi i Sunyer (IDIBAPS), Barcelona, Spain, <sup>7</sup>Parkinson's Disease and Movement Disorders Unit, Institut de Neurociències Hospital Clínic, CIBERNED, Barcelona, Spain and <sup>8</sup>Institució Catalana de Recerca i Estudis Avançats (ICREA), Barcelona, Spain

Received July 05, 2017; Revised October 05, 2017; Editorial Decision October 17, 2017; Accepted October 20, 2017

## ABSTRACT

Recent evidence indicates a link between Parkinson's Disease (PD) and the expression of  $\alpha$ -synuclein (*SNCA*) isoforms with different 3' untranslated regions (3'UTRs). Yet, the post-transcriptional mechanisms regulating *SNCA* expression are unknown. Using a large-scale *in vitro* /*in silico* screening we identified RNA-binding proteins (RBPs) that interact with *SNCA* 3' UTRs. We identified two RBPs, ELAVL1 and TIAR, that bind with high affinity to the most abundant and translationally active 3' UTR isoform (575 nt). Knockdown and overexpression experiments indicate that both ELAVL1 and TIAR positively regulate endogenous *SNCA* *in vivo*. The mechanism of regulation implies mRNA stabilization as well as enhancement of translation in the case of TIAR. We observed significant alteration of both TIAR and ELAVL1 expression in motor cortex of post-mortem brain donors and primary cultured fibroblast from patients affected by PD and Multiple System Atrophy (MSA). Moreover, trans expression quantitative trait *loci* (trans-eQTLs) analysis revealed that a group of single nucleotide polymorphisms (SNPs) in *TIAR* genomic locus influences *SNCA* expression in two different brain areas, *nucleus accumbens* and *hippocampus*. Our study sheds light on the 3' UTR-mediated regulation of *SNCA* and its link with PD pathogenesis, thus opening up new avenues for in-

vestigation of post-transcriptional mechanisms in neurodegeneration.

## INTRODUCTION

Parkinson's disease (PD) is the second most common human neurodegenerative disorder, after Alzheimer disease. PD is a multifactorial disorder in which different factors such as aging, genetic susceptibility and environmental insults converge to cause neurodegeneration. Idiopathic PD represents over 90% of PD cases, while genetic PD, caused by mutations in one or more of the PD-associated *loci*, is only 10% of the cases (1).

PD initiates in the central nervous system and spreads to the peripheral and enteric parts of the nervous system. The most important feature in the brains of PD patients is the selective loss of dopaminergic pigmented neurons within the *substantia nigra* and, to a lesser extent, neurons residing in the ventral tegmental and retrorubral areas (2). The neuropathological hallmark of Parkinson's disease is the presence of eosinophilic inclusion in the soma of neurons known as Lewy bodies (LBs), as well as in the neurites where the inclusions are called Lewy neurites. LBs are composed of a mixture of lipids, neuromelanin and up to several hundred individual proteins, including ubiquitin, heat-shock proteins, dj-1, sod1 and 2, synphilin-1, tau, tyrosine hydroxylase, and many others, but the key component is  $\alpha$ -synuclein (*SNCA* gene), a small protein enriched at the presynaptic terminals (3).

The post-transcriptional mechanisms controlling *SNCA* expression are at present unknown, although we previously observed that UTR-mediated regulation could play a key role in controlling  $\alpha$ -synuclein protein abundance (4).

\*To whom correspondence should be addressed. Tel: +34 93 316 01 16; Fax: +34 93 396 99 83; Email: gian.tartaglia@crg.es

†On behalf of the Catalan MSA Registry (CMSAR)—see Appendix.

Specific *SNCA* transcript isoforms with different 3'UTR lengths have been found enriched in cerebral cortex samples of *post-mortem* PD patients (5). Recently, in a cohort of 202 cases of *de novo* motor PD, significantly lower levels of *SNCA* mRNA with extended 3'UTRs have been quantified by digital expression analysis (6). These findings are particularly relevant to PD etiopathogenesis: a switch of alternative polyadenylation to favour expression of specific *SNCA* 3'UTR isoforms enables the binding of a number of *trans*-acting factors that alter protein production, localisation and function.

Post-transcriptional networks induce changes in expression levels that are about one order of magnitude smaller than those caused by transcription factors, but  $\alpha$ -synuclein is highly concentrated at the pre-synaptic terminals of neurons (70–140  $\mu$ M) and even small fluctuations of its concentration can indeed induce aggregation (7). In the present work we address the question of which RNA-binding proteins (RBPs) are able to bind the different 3'UTRs of *SNCA* mRNA and control its expression. Following the unbiased discovery of protein interactors by means of a large-scale *in vitro* / *in silico* screening, we prioritised two RBPs, ELAVL1 and TIAR, that target *SNCA* 3'UTRs and their influence stability and translation efficiency. Our study suggests that TIAR and ELAVL1 are key regulators of  $\alpha$ -synuclein intracellular concentration and function.

## MATERIALS AND METHODS

### Human protein array

The RNA sequence corresponding to *SNCA* 3'UTR short (575 bp), medium (1.07 kb) and long (2.5 kb) were cloned in pBluescript-SK(+) empty plasmid. The RNA probes of the *SNCA* long 3'UTR (3'UTRL) were synthesized by *in vitro* transcription (IVT) with T7 and T3 RNA polymerase (Agilent) for the sense and antisense strand respectively, and fluorescently labeled with *Label IT*  $\mu$ -Array Cy5 labeling kit (Mirus) applying minor modifications to manufacturer's instructions. RNA concentration and labeling density were measured with Nanodrop 1000 spectrophotometer (Thermo Scientific). RNA integrity was verified by Agilent 2100 Bioanalyzer. The two probes corresponding to the *SNCA* 3'UTR long sense and antisense sequence were loaded on a 1% agarose denaturing gel (2.2 M formaldehyde). Both the size and the integrity of the probes were checked.

ProtoArray<sup>®</sup> Human Protein Microarrays v5.2 (Life Technologies), containing 9546 spotted proteins, were probed with the Cy5 labeled RNA of interest as previously reported (8). The dry slides were scanned within 2 h of the completion of the hybridization using a GenePix 4000B Microarray scanner (Molecular Devices). The intensity of the signal at 635 nm wavelength at each spotted protein location was determined with GenePix Pro 6.1 software (Molecular Devices). Data was filtered based on signal to background ratio for each of the duplicate spots to be >2.5-fold and Z-score  $\geq 3$  from the global mean signal from all the spotted proteins.

### Luciferase gene reporter assay

*SNCA* short 3'UTR (570 bp), medium (1.07 kb) and long (2.5 kb) were sub-cloned in a pGL4-TK-*Firefly* luciferase (pGL4-TK-FL) plasmid vector at the 3'end of the *Firefly* luciferase coding sequence. To guarantee the expression of the long or medium 3'UTR isoforms only, the proximal polyadenylation sites (PAS), present within the sequence of the 3'UTRs, were deleted at positions 262–267 nt, 468–473 nt, 529–553 nt and 1054–1059 nt (taken from (9)).

HeLa cells at 80% of confluency were transfected with with Lipofectamine 2000 (Life Technologies) following manufacturer's instructions. 130 fmol of pGL4-TK-FL empty plasmid or pGL4-TK-FL carrying the sequence of the short medium or long 3'UTR, were co-transfected with 50 ng of pGL4-TK-*Renilla* luciferase plasmid (pGL4-TK-RL), used as internal control to normalize for differences in transfection efficiency.

Forty eight hours after transfection, the dual luciferase activity was measured at a Tecan Infinite M-200 plate reader, using Dual-Luciferase reporter assay system (Promega) following manufacturer's instructions. *Firefly* luciferase activity was normalized with *Renilla* luciferase activity and then normalized *Firefly* luciferase activity of pGL4-TK-FL-*SNCA* 3'UTRs constructs was compared to the activity of pGL4-TK-FL vector.

In the case of TIAR and ELAVL1 knock-downs, the RNA corresponding to each of the aforementioned constructs were *in vitro* transcribed using MEGAscript T7 transcription kit (Ambion) in presence of modified G-cap nucleotide. HeLa control and knockdown cells were seeded in 48-well plates and *Firefly* and *Renilla* RNA were co-transfected using TransMessenger transfection reagent (Qiagen) following manufacturer's instructions. Four hours after transfection cells were lysed and the dual luciferase activity was measured as described before.

### RNA affinity purification

The biotinylated RNA probes of *SNCA* short 3'UTR (3'UTRS) and long (3'UTRL) were synthesized by *in vitro* transcription from linearized pBSK plasmid vector by using a T7 MegaScript kit (Ambion) with addition of biotin-14-CTP (Life Technologies). RNA concentration and integrity were verified by NanoDrop 1000 spectrophotometer (Thermo Scientific) and by denaturing agarose gel electrophoresis of the RNA. Successful biotinylation was checked using the Chemiluminescent Nucleic Acid Detection Module kit (Thermo Scientific).

RNA affinity purification was performed as described by Hammerle M. with some adaptations (10) (see Supplementary Materials for details).

### RNA electrophoretic mobility shift assay

Fragments A (1–192 nt), B (193–390 nt) and C (391–575 nt) of *SNCA* 3'UTR short were obtained by deletion of pBSK(+)-3'UTR short with Gibson cloning approach. Corresponding radiolabeled RNA probes were synthesized by IVT with T7 Megascript kit (Ambion) and incorporation of  $\alpha$ <sup>32</sup>P-UTP (Perkin Elmer). Size and integrity of the probe

were verified on a 8% TBE-Urea gel, while probe radioactivity was measured with a scintillation counter (Perkin Elmer). N-terminal GST-tagged TIAR and ELAVL1 proteins were overexpressed in *Escherichia coli* from pGEX2T and pDEST15 vectors, respectively, and purified using glutathione sepharose beads. The RNA electrophoretic mobility shift assay and the competition assay were performed as previously described (11) (see Supplementary Materials for details).

### RNA stability assay

Hela cells (control, TIAR and ELAVL1 knockdown) were seeded in 12-wells plate at a density of  $1.6 \times 10^5$  cells per well. The general transcription inhibitor actinomycin D (Sigma Aldrich) was added at a concentration of 5 g/ml for 0, 4, 8 and 12 h. Total RNA was isolated with Maxwell 16 LEV simply RNA cells kit (Promega) and analyzed by RT-qPCR. ACTB was used as a reference gene for normalization ( $\Delta$ Ct), and the  $\Delta$ Ct of each time point was compared to time 0 h ( $\Delta\Delta$ Ct). For each experiment the average of triplicate wells per condition was calculated and used to determine mean values and standard deviation of three biological replicates. A Student's *t*-test was performed to assess for significant differences of RNA decay rate between the three conditions.

### Measurement of $\alpha$ -synuclein, TIAR and ELAVL1 levels in motor cortex and primary fibroblasts of Parkinson's disease (PD) and Multiple System Atrophy (MSA) patients

The human *post-mortem* motor cortex brain tissue stored at  $-80^\circ\text{C}$  was obtained from the Brainbank from Institut d'Investigacions Biomèdiques August Pi I Sunyer (IDIBAPS)-Biobank, with the corresponding informed consent signed by donors or relatives. Approval of the local ethics committee was requested for the use of brain tissue and for access to medical records for research purposes. The tissue samples were dissected and used in a manner compliant with the Declaration of Helsinki. Brain tissue of five Parkinson's disease (PD) patients, five Multiple System Atrophy (MSA) patients and four control individuals (without neurological affection) was used in this study. The three groups were matched for age of onset and age of death, gender and severity of the disease (Supplementary Table S1).

Primary cultured fibroblasts (~5 million cells/pellet) were obtained from skin biopsy of idiopathic PD, LRRK2-associated PD, MSA patients and healthy control individuals (Supplementary Table S2).

Total proteins were extracted by lysing with RIPA buffer supplemented with Protease inhibitors (Roche). After sonication with bioruptor sonifier (Branson) samples were centrifuged at 16 000 g for 15 min and supernatants were measured with Bradford reagent (Sigma Aldrich).  $\alpha$ -synuclein, TIAR, ELAVL1, tubulin and  $\beta$ -actin levels were measured by western blot as described previously. Statistical significance was calculated by Wilcoxon's test.

### RNA 3'end sequencing, polysome profiling, TIAR and ELAVL1 knockdown and overexpression

See Supplementary Materials for detailed description of the protocol.

## RESULTS

### Large-scale identification of 3' UTR interactions

Human *SNCA* mRNA is expressed with five isoforms of different 3'UTR lengths (ranging from 290 nt to 2500 nt) depending on the choice of the polyadenylation site (5).

We probed the largest *SNCA* 3'UTR (2500 nt, containing sequences of the other isoforms, Figure 1A) and its antisense RNA (negative control) on three separate protein arrays (8,12) obtaining high reproducibility between replicates (Pearson's correlations of  $>0.90$ ; Figure 1B and C; Material and Methods; Supplementary Materials). To identify significant binding events, we selected proteins with fold change (signal to background ratio)  $>2.5$  and associated Z-score  $>3$ , obtaining around 100 proteins per experiment (8,12). By considering the intersection of three independent replicates, and removing interactions in common between sense and antisense RNAs, we discarded unspecific binders. Out of 9546 candidates, we identified 27 proteins binding to *SNCA* 3'UTRs (Figure 1D).

Following a recently published approach (13), we used the *catRAPID* algorithm (14) to prioritize candidates for experimental characterization (Supplementary Materials). *catRAPID* estimates RNA-RBP affinities exploiting physico-chemical properties of nucleotide and amino acid chains including secondary structure, hydrogen bonding, and van der Waals' propensities to predict protein-RNA associations (15). Importantly, *catRAPID* calculations of RBP interactions with *SNCA* 3'UTR show high agreement with protein array results (strong signal RBPs are predicted with an Area under the ROC curve  $>0.80$ ; Supplementary Materials; Supplementary Figure S1A).

Our approach indicates that TIAR, CELF1 and ELAVL1 have the highest interaction propensities (*catRAPID* interaction score  $> 2$ ; Figure 1D). We selected TIAR and ELAVL1 for a more in depth investigation as they are significantly down-regulated in PD patients (differently from CELF1; Figure 1E) (16). Moreover, literature evidence indicates that TIAR and ELAVL1 bind to similar sequences and regulate mRNA stability and translation (17–22), thus suggesting common mechanisms of action on *SNCA* 3'UTR. Comparison of our RBP candidates with interactions reported in the UTR database AURA (23,24) reveals that TIAR and ELAVL1 have the largest number of binding sites in *SNCA* 3'UTR (respectively: 6 for TIAR and 12 for ELAVL1), while other proteins are associated with lower signal intensities (AGO1; *catRAPID* score = 1.39; 1 binding site) or interact with control RNA (TIA1; *catRAPID* score = 2.46; 4 binding sites; Supplementary Figure S1B).

### *SNCA* with short 3'UTR is predominant in SH-SY5Y and HeLa cells and has increased protein translation

To quantify the abundance of the different 3'UTR isoforms of *SNCA* mRNA (Figure 2A), we performed a modified se-



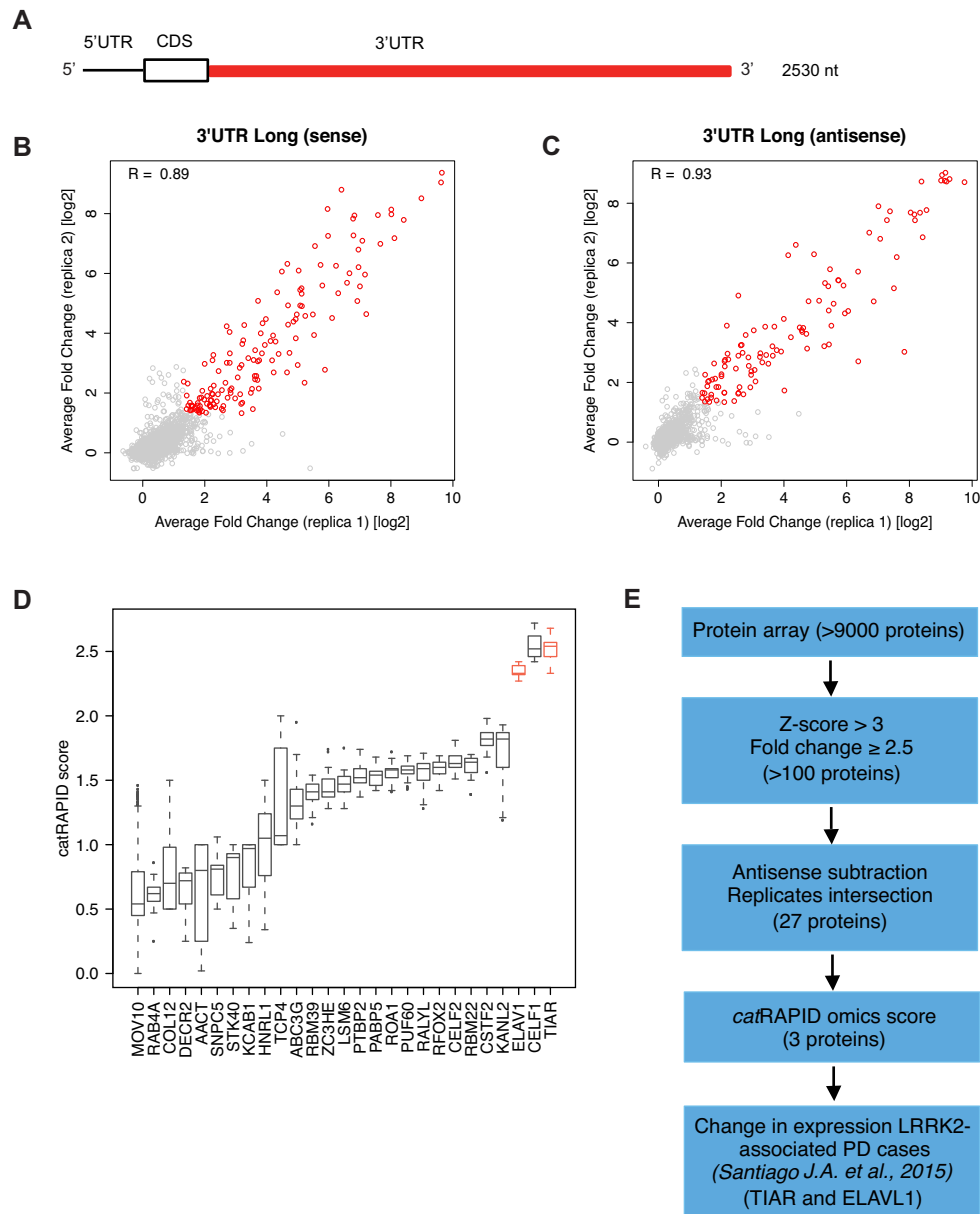

**Figure 1.** Large scale screening of *SNCA* 3'UTR protein interactors. (A) *SNCA* 3'UTR long (3'UTR L) used in our experiments *in vitro*; Pearson's correlation between two protein array replicates probed with (A) 3'UTR L sense and (B) antisense (right) RNAs. (sense:  $R = 0.89$ ; (C) antisense:  $R = 0.93$ ). Selected binders with fold change (signal to background ratio)  $> 2.5$  and associated Z-score  $> 3$  are represented as red dots, while less significant binders are reported in grey. (D) Median value of *catRAPID* score of *SNCA* 3'UTR top interactors: 27 proteins; TIAR (also known as TIAL1) and ELAVL1 (ELAV1) are highlighted in red. (E) Sketch of the *in vitro* / *in silico* procedure followed to identify TIAR and ELAVL1 interactions.

quencing protocol to which we refer as gene specific-3'end RNA sequencing (Material and Methods; Supplementary Materials).

We used two different cell lines, HeLa and human neuroblastoma cells (SH-SY5Y). SH-SY5Y cells were *in vitro* differentiated towards a dopaminergic neuron-like phenotype by treatment with retinoic acid (RA) and 12-O-tetradecanoyl-phorbol-13-acetate (TPA), in order to recapitulate the biological context of *substantia nigra* dopaminergic neurons that are mainly affected in Parkinson's disease (25). We found that the isoform carrying the 575 nt 3'UTR is the most abundant accounting for 51.5% and 41.3% of total

*SNCA* mRNA in HeLa and *in vitro* differentiated SH-SY5Y respectively (Figure 2B). The least abundant isoforms correspond to those carrying 480 nt and 2.5 kb long 3'UTR (Figure 2B). The isoform carrying the 2.5 kb long 3'UTR is instead expressed 2.5 times more in SH-SY5Y than HeLa cells, in agreement with the lengthening of 3'UTRs observed in the brain (Figure 2B) (26).

Moreover, the relative firefly luciferase activity of construct FL-*SNCA* 3UTRS (575 nt) was more than 3.5 and 17.5 times higher than the firefly luciferase empty vector and FL-*SNCA* 3UTRL (2.5 kb) respectively (Figure 2C and D;  $P$ -value  $< 0.05$ ; Wilcoxon test). A similar trend is ob-

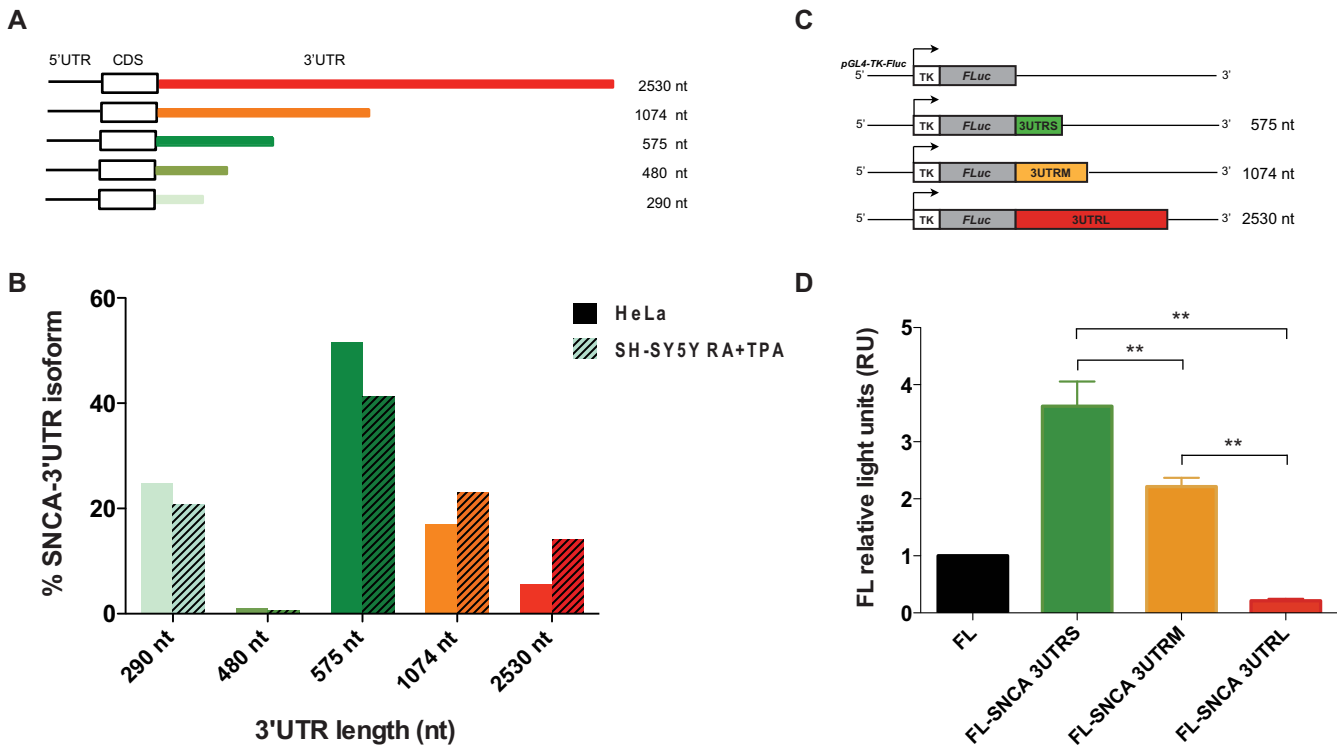

**Figure 2.** Measurement of *SNCA* 3'UTR isoforms expression in HeLa and *in vitro* differentiated SH-SY5Y cell lines and effect of 3'UTR length on gene reporter activity. (A) Details of the five isoforms of *SNCA* transcript with different lengths of the 3'UTR, ranging from 290 nt (light green) to 2.5 kb (red). (B) Percentage of each of the five *SNCA* transcript isoforms in HeLa cells and *in vitro* differentiated SH-SY5Y cells measured by gene-specific 3' end RNA sequencing. (C) Dual luciferase gene reporter assay. Scheme of the three constructs carrying the sequence of *SNCA* 3'UTR S (575 nt), M (1074 nt) and L (2530 nt) at the 3' of luciferase coding sequence. (D) Firefly relative to Renilla luciferase activity of the three constructs (FL-SNCA 3'UTRS, FL-SNCA 3'UTRM and FL-SNCA 3'UTRL) compared to control empty vector FL. \* *P*-value < 0.05 (Wilcoxon's test).

served at the RNA level, with FL-SNCA 3UTRS being two times more abundant than the control vector carrying only the luciferase coding sequence (Supplementary Figure S2). Our finding suggests that the long 3'UTR contains a higher number of sequence elements targeted by trans-acting factors, such as microRNAs and destabilizing RBPs, which promote RNA degradation or inhibit its translation.

Taken together, our experiments indicate that the isoform carrying the short 3'UTR is mostly contributing to protein production and we proceeded to further characterise TIAR and ELAVL1 binding and their action.

### TIAR and ELAVL1 are able to bind specific regions of *SNCA* 3'UTR *in vitro* and *in vivo*

Using an RNA affinity purification assay we confirmed that TIAR and ELAVL1 bind to both *SNCA* 'long' (2.5 kb) and 'short' (575 nt) 3'UTR isoforms (Figure 3A; Material and Methods; Supplementary Materials).

As shown in Figure 3B–D, ELAVL1 interacts preferably with the long 3'UTR, in agreement with previously published CLIP data that report the presence of multiple binding sites all along the 2.5 kb of the 3'UTR (27–29) (Figure 3A). TIAR interacts with both 3'UTRs (Figure 3B and C) in accordance with CLIP binding sites mapped in the first 600 nt of the UTR region (30) (Figure 3A). FMR1 was chosen as a negative control on the basis of protein microarray results (fold change < 1.7). As shown in Figure

3B, FMR1 does not bind to the two RNA sequences tested. TIAR and ELAVL1 binding was also confirmed in absence of UV cross-linking (Supplementary Figure S3).

We next defined the region of *SNCA* short 3'UTR (575 nt) that interacts with TIAR and ELAVL1 by measuring electrophoretic mobility of nucleotides 1–192 (A), 193–390 (B) and 391–575 (C; Figure 4A) upon incubation with increasing concentrations of the GST-tagged TIAR and ELAVL1 proteins (Figure 4B and C). As shown in Figure 4B and C, both proteins have a binding ability to the three fragments but the highest affinity was observed for fragment B (Supplementary Figure S5). Indeed, TIAR and ELAVL1 bind specifically to fragment B, as seen by using fragments A, B and C as unlabeled competitors (Figure 4D and E). We also observed higher molecular complexes in the case of ELAVL1, corresponding to dimers and multimers forming upon incubation with high ELAVL1 concentrations (Figure 4C). To further investigate TIAR and ELAVL1 binding to fragment B, we incubated the RNA with a fixed amount of one protein and increasing amounts of the other. As shown in Figure 4F, the two proteins compete for their binding to fragment B and increasing amounts of TIAR or ELAVL1 show clear displacement of the protein/RNA complex.

These experiments indicate that nucleotides 193–390 (fragment B) interact with TIAR and ELAVL1 proteins with the highest binding affinity and sequence specificity and that the two proteins compete for the binding.

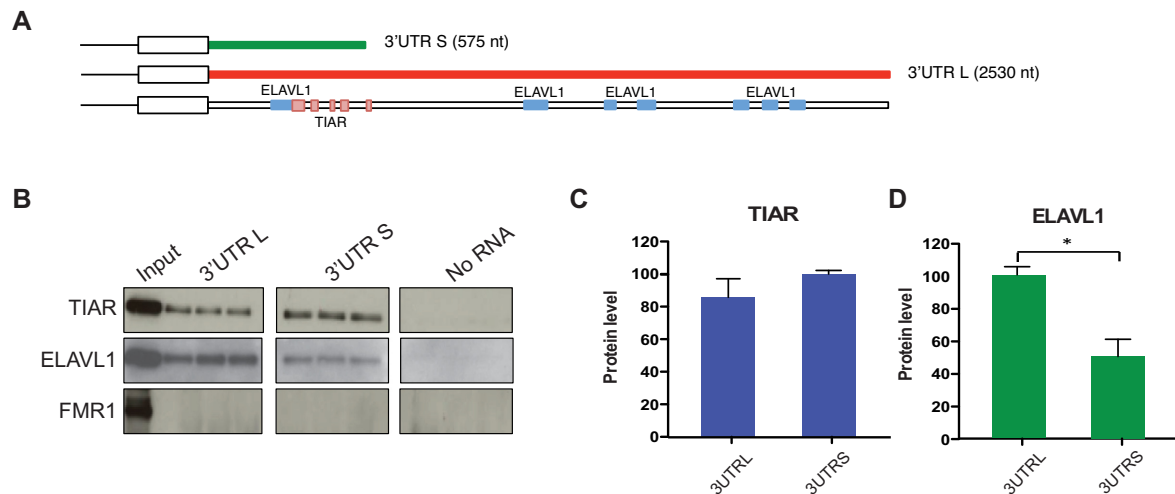

**Figure 3.** *In vitro* validation of TIAR and ELAVL1 binding to *SNCA* 3'UTR. (A) CLIP binding sites along the sequence of *SNCA* 3' UTR as reported in the Atlas of UTR regulatory activity (AURA) database (<http://aura.science.unitn.it/>). TIAR cluster of binding sites (291–318, 353–367, 429–437, 476–511, 578–584 nt) are represented as pink boxes and ELAVL1 binding sites (230–315, 1224–1276, 1546–1567, 1650–1690, 2057–2102, 2113–2153 and 2229–2269 nt) are represented as blue boxes. (B) RNA affinity purification assay performed in technical triplicates. (C) TIAR and (D) ELAVL1 are co-purified with the *in vitro* synthesized RNA of *SNCA* 3'UTR long and short (Western Blot). FMR1 is used as negative control.

### Post-transcriptional regulation of *SNCA* by TIAR and ELAVL1

TIAR and ELAVL1 knockdown and overexpression in HeLa cells indicate that the two RBPs play a positive regulatory role on *SNCA* expression (Material and Methods; Supplementary Materials). This is particularly evident in the case of TIAR whose expression significantly influences the levels of both *SNCA* RNA and protein (Figure 5A–C, Figure 5G–I) inducing changes in expression that are compatible with those observed in idiopathic Parkinsonism (31,32). More specifically, upon TIAR knockdown we observed a significant decrease of endogenous  $\alpha$ -synuclein expression at the RNA and protein level with a 0.63 and 0.5 fold-change respectively (Student's *t*-test, *P*-value < 0.01, Figure 5A–C). TIAR overexpression induces a 2.2 and 1.6 fold increase in  $\alpha$ -synuclein RNA and protein, respectively. By contrast, ELAVL1 showed a milder effect and mainly on *SNCA* protein levels (Figure 5D–F, Figure 5J–L). Indeed, upon ELAVL1 knockdown we observed  $\sim$ 0.8-fold decrease of  $\alpha$ -synuclein RNA and protein levels, while ELAVL1 overexpression only increases the protein levels of 1.52-fold with no significant change of the mRNA levels with respect to control.

The decrease of *SNCA* mRNA upon knockdown of TIAR and, to a lesser extent, of ELAVL1, suggest that one of the possible mechanisms of regulation orchestrated by these proteins could be the stabilisation of the mRNA through direct binding at the 3'UTR and interference with RNA degradation factors such as microRNAs and other RBPs. As a matter of fact, the role of ELAVL1 as an RNA stabilizing factor is extensively documented in the literature (33,34). In the case of TIAR, the protein is also known for its effect on translation regulation (35–37) but we cannot exclude that the protein might play other functions in mRNA metabolism.

We used the transcription inhibitor actinomycin D to test that the two proteins could stabilize *SNCA* mRNA. We measured a decay rate of 30% and 43% in TIAR and ELAVL1 knockdown cells respectively while only 5% decay rate was observed in control cells at 4 hours of actinomycin D treatment (Figure 6A and B), showing that both RBPs protect *SNCA* mRNA from degradation.

As TIAR and ELAVL1 are reported to modulate mRNA translation (35–37), we decided to test whether they could participate to the translation of *SNCA* mRNA. To do so, we traced the distribution of the polysome profile of HeLa control, TIAR and ELAVL1 knockdown cells (Figure 6C). In all three conditions *SNCA* mRNA was distributed (70–75%) between fractions 3 and 7 or more (10–12,38) ribosomes. We observed a substantial shift of *SNCA* mRNA in cells depleted for TIAR protein, from the more translationally active high molecular weight (HMW) polysomal fraction 12, corresponding to six-seven ribosomes, to the less translationally active low molecular weight (LMW) fraction 10, which corresponds to three ribosomes (Figure 6D). Indeed, only 12.9% of *SNCA* mRNA co-sedimented with fraction 12 in TIAR knockdown cells compared to 27.5% of *SNCA* mRNA present in the same fraction in control cells. In contrast, no relevant change was observed upon knockdown of ELAVL1 (Figure 6D).

We conclude that, in addition to stabilizing *SNCA* mRNA, TIAR also promotes *SNCA* mRNA translation through a mechanism that needs to be further elucidated. By contrast, ELAVL1 seems to play a main role in *SNCA* mRNA stabilization, in agreement with its very well documented function in RNA metabolism. Yet, it does not have any relevant effect on its translation efficiency.

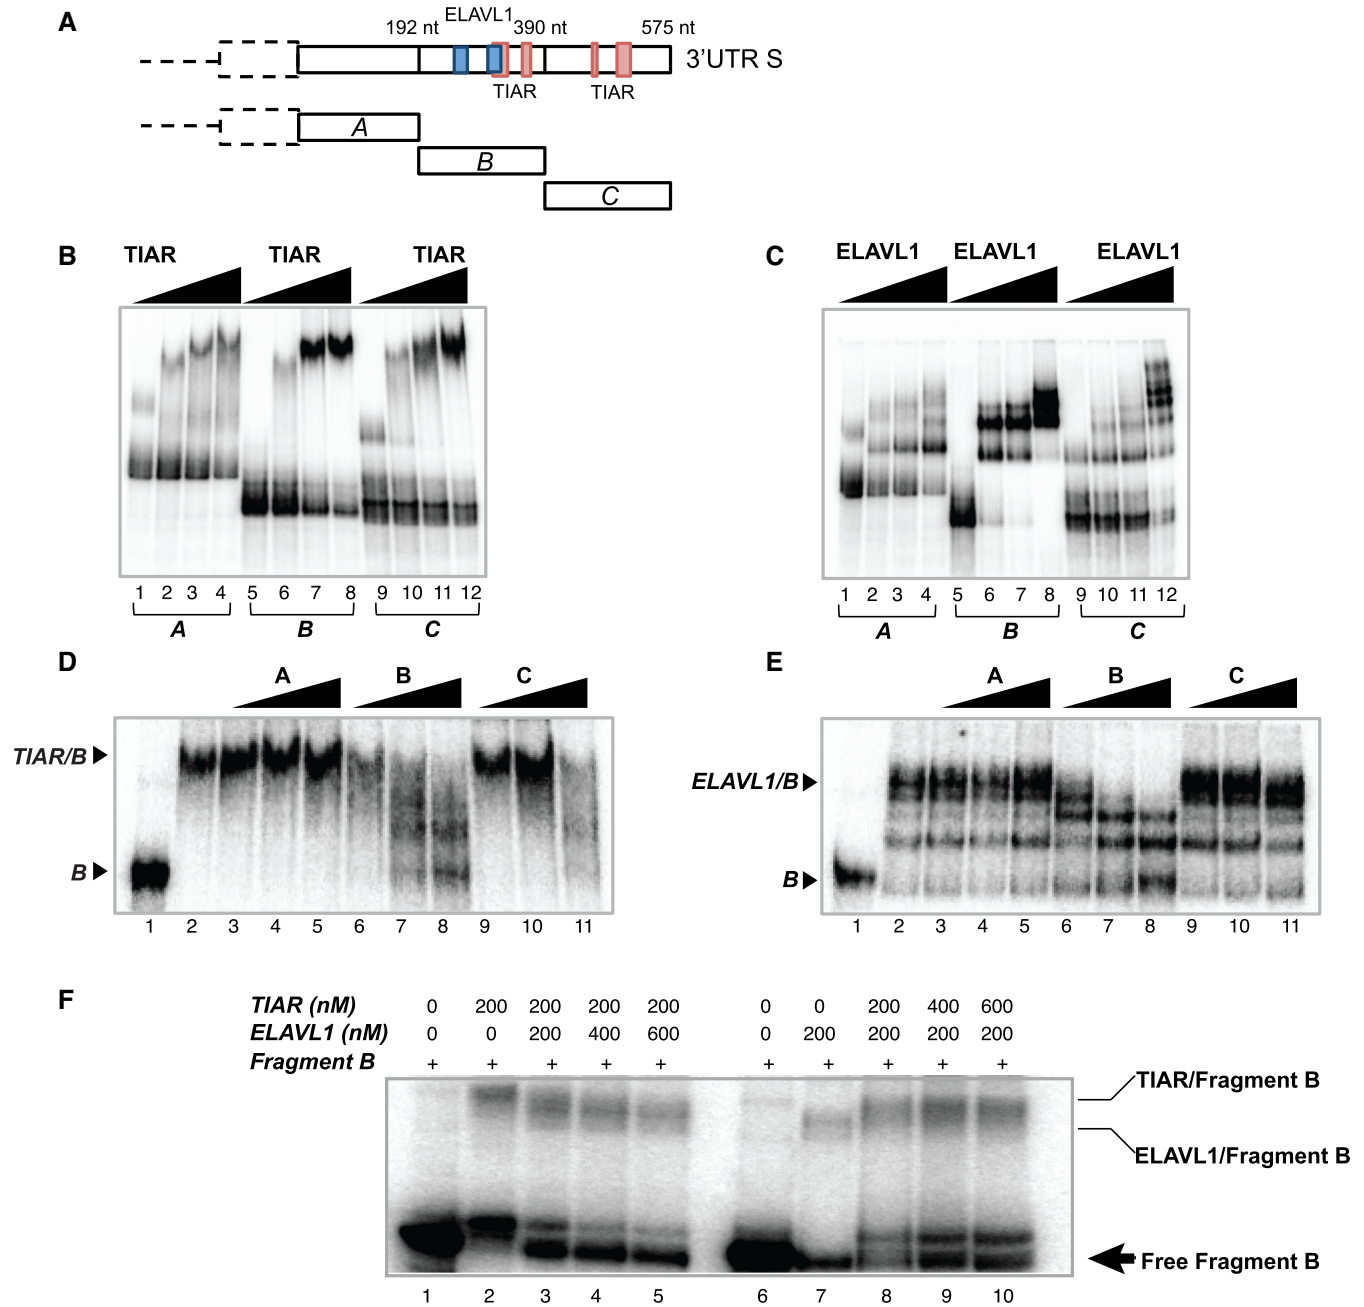

**Figure 4.** *In vitro* characterization of TIAR and ELAVL1 binding sites of *SNCA* 3'UTR short. (A) Schematic representation of the sequence of *SNCA* 3'UTR S and TIAR/ELAVL1 binding sites previously identified by CLIP. The sequence of the 3'UTR S is divided into three fragments (A, B and C) of ~190 nt each to test the binding ability of TIAR and ELAVL1. (B) RNA electrophoretic mobility shift assay (REMSA) of fragments A, B and C of *SNCA* 3'UTR S upon incubation with increasing concentrations of GST-tagged TIAR protein (0, 100, 200, 500 nM). (C) RNA electrophoretic mobility shift assay (REMSA) of fragments A, B and C of *SNCA* 3'UTR S upon incubation with increasing concentrations of GST-tagged ELAVL1 protein (0, 100, 200, 500 nM). (D) Competition gel shift assay showing binding specificity of TIAR protein for fragment B. Lane 1. Probe B alone, Lane 2. Probe B with 200 nM TIAR, Lane 3–11. Probe B with 200 nM TIAR in presence of 0.1, 1 and 10 nM of cold probe A, B and C. (E) Competition gel shift assay showing binding specificity of ELAVL1 protein for fragment B RNA. Lane 1. Probe B alone, Lane 2. Probe B with 100 nM ELAVL1, Lane 3–11. Probe B with 100 nM ELAVL1 in presence of 0.1, 1 and 10 nM of cold probe A, B and C. (F) Competition assay. Labeled fragment B was incubated with 200 nM of TIAR (lane 2) or 200 nM of ELAVL1 (lane 7). Competition between TIAR and ELAVL1 was performed by incubating fragment B with constant amount of TIAR (200nM) and increasing amount of ELAVL1 (lanes 3, 4 and 5) or constant amount of ELAVL1 (200nM) and increasing amounts of TIAR (lanes 8, 9 and 10).



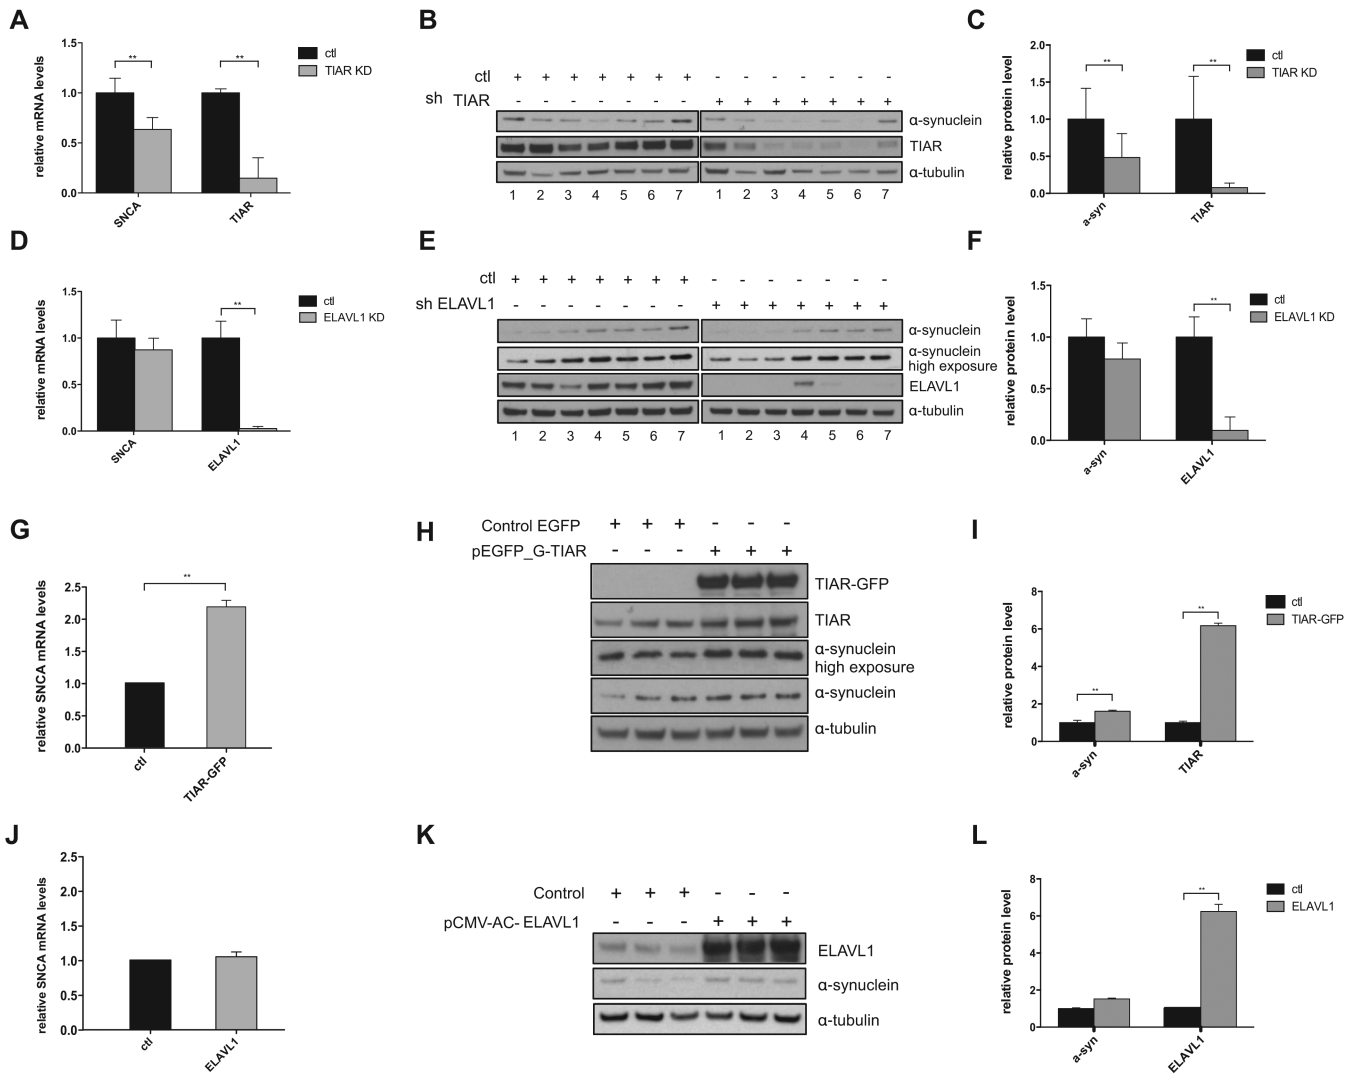

**Figure 5.** Analysis of TIAR and ELAVL1 regulatory role on  $\alpha$ -synuclein expression in HeLa cells. (A) Relative *SNCA* mRNA levels measured by qPCR upon stable knockdown of TIAR in HeLa cells compared to control cells. (B)  $\alpha$ -synuclein protein down-regulation measured by Western Blot upon stable knockdown of TIAR protein in HeLa cells. (C) Average and standard deviation of seven biological replicates are reported (\*\**P*-value < 0.01, Student's *t*-test). (D) Fold change of *SNCA* mRNA upon KD of ELAVL1. (E)  $\alpha$ -synuclein protein down-regulation measured by western blot upon stable knockdown of ELAVL1 in HeLa cells. (F) Average and standard deviation of seven biological replicates are reported (\*\**P*-value < 0.01, Student's *t*-test) (G–I) Relative *SNCA* mRNA and  $\alpha$ -synuclein protein up-regulation in HeLa cells overexpressing GFP-tagged TIAR protein compared to control cells (\*\**P*-value < 0.01, Student's *t*-test). (J–L) Relative *SNCA* mRNA and  $\alpha$ -synuclein protein levels in HeLa cells overexpressing ELAVL1 protein compared to control cells (\**P*-value < 0.05, Student's *t*-test).

### TIAR and ELAVL1 regulation is mediated by *SNCA* 3'UTR

To test whether the regulation observed endogenously (Figure 5) requires the binding to *SNCA* 3'UTRs, we measured the dual firefly luciferase activities of the constructs FL-*SNCA* 3UTRS, FL-*SNCA* 3UTRM and FL-*SNCA* 3UTRL upon TIAR or ELAVL1 knockdown. We obtained a significant decrease of the relative firefly luciferase activity of 3'UTRS, 3'UTRM and 3'UTRL in HeLa cells depleted of TIAR (Figure 7A). More specifically, we measured a fold decrease of 0.63, 0.68 and 0.61 for FL-*SNCA* 3'UTRS, FL-*SNCA* 3'UTRM and FL-*SNCA* 3'UTRL. No significant change was instead observed for the construct carrying the sequence of the firefly luciferase gene, indicating that the decrease is specific for the constructs containing *SNCA*

3'UTRs. Our result indicates that the positive regulatory role of TIAR is indeed achieved through the direct binding of the RBP to the 3'UTR of *SNCA* mRNA, in agreement with our initial hypothesis. As for ELAVL1 KD, only a mild decrease of the signal is observed in all three RNAs containing *SNCA* 3'UTRs with respect to control HeLa cells with an average fold change of 0.86, 0.88 and 0.77 respectively (Figure 7B).

### MicroRNAs do not compete with TIAR and ELAVL1 binding to *SNCA* 3' UTR in HeLa cells

Previous reports indicate that ELAVL1 regulates microRNA expression by intervening in pri- or pre-microRNAs processing of miR-7 and miR-16 (39,40).



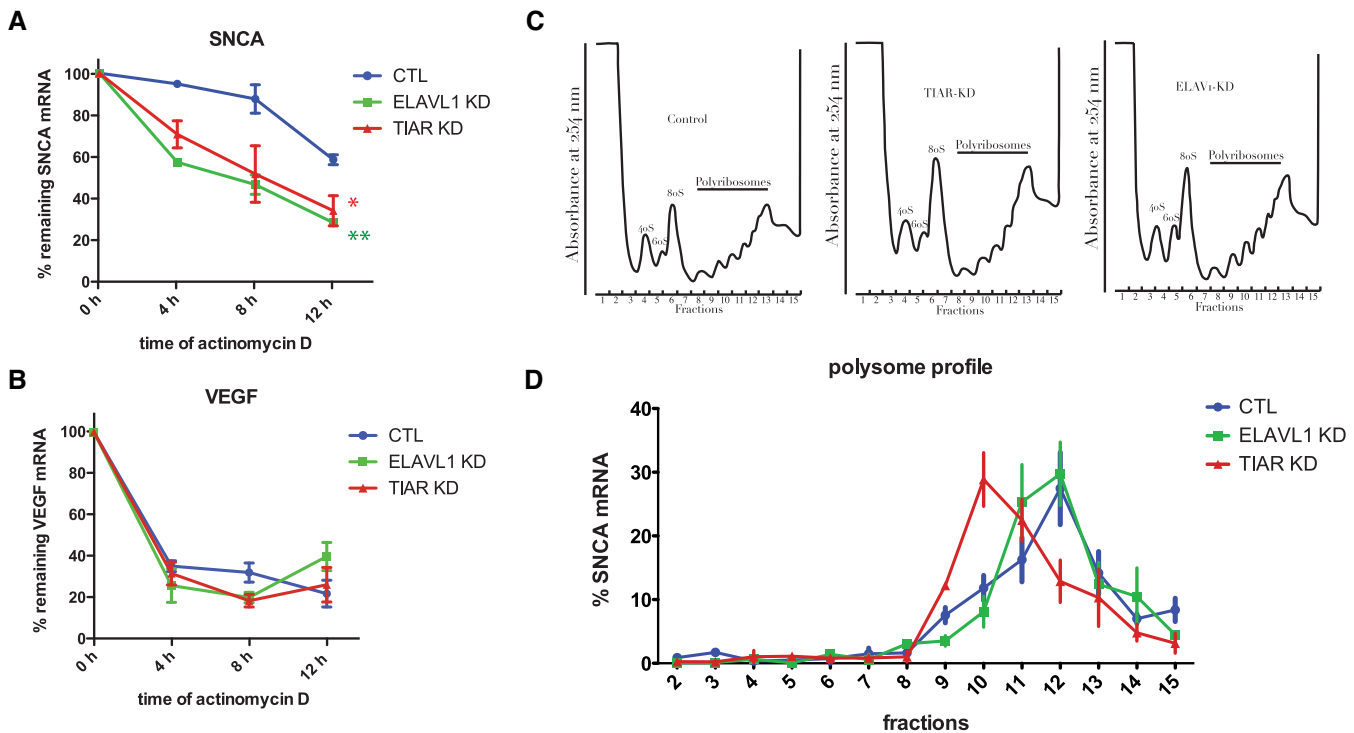

**Figure 6.** TIAR and ELAVL1 role in *SNCA* mRNA stability and translation. (A) Percentage of remaining *SNCA* mRNA measured at 0, 4, 8 and 12 h after transcription inhibition with actinomycin D in control, TIAR knockdown and ELAVL1 knockdown HeLa cells. Mean and standard deviation of three independent experiments are shown (Kolmogorov-Smirnov test with respect to control curve, \**P*-value < 0.1; \*\**P*-value < 0.01). (B) VEGF mRNA is a control for the effectiveness of the actinomycin D treatment. (C) Polysome profile of HeLa control, TIAR knockdown and ELAVL1 knockdown cells. (D) Percentage of *SNCA* mRNA distribution across polysome gradient in HeLa control, TIAR knockdown and ELAVL1 knockdown conditions. Data shown are mean with standard deviation of three independent experiments.

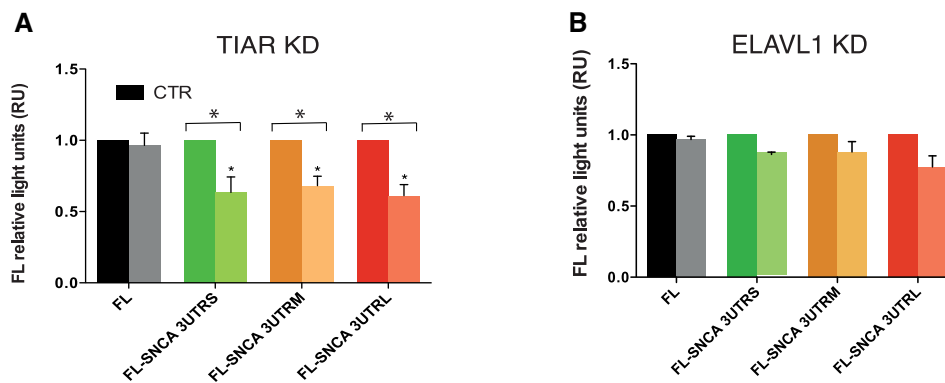

**Figure 7.** Dual firefly luciferase activity of *SNCA* 3' UTRs upon TIAR or ELAVL1 knockdown. We measured luciferase activities of *SNCA* 3' UTRs with respect to control empty vector FL. (A) TIAR KD. We observed a fold decrease of 0.63, 0.68 and 0.61 for FL-*SNCA* 3'UTRS, FL-*SNCA* 3'UTRM and FL-*SNCA* 3'UTRL. No significant change was instead observed for the construct carrying the sequence of the firefly luciferase gene (B). ELAVL1 KD. Mild decrease of the signal is observed for FL-*SNCA* 3'UTRS, FL-*SNCA* 3'UTRM and FL-*SNCA* 3'UTRL with an average fold change of 0.86, 0.88 and 0.77 respectively. \* *P*-value < 0.05 (Wilcoxon's test).

As miR-7 has been implicated in down-regulation of *SNCA* expression (41), it is possible that a regulatory loop involving ELAVL1 inhibition of miR-7 causes release of *SNCA* from miR-7 producing an increase of  $\alpha$ -synuclein expression. Such a scenario is compatible with our observation that ELAVL1 depletion induces *SNCA* down-regulation, which could be mediated by miR-7 up-regulation. However, when we measured miR-7 expression in ELAVL1 in both knockdown and control HeLa cells, we

found that the general level of expression of miR-7 is very low (PCR cycle threshold Ct of 33, while U6 control shows Ct of 27) and we therefore ruled out its involvement.

Similarly, the overlap between TIAR binding site (Figure 3B-C) and the target region of miR-153, which was reported to down-regulate *SNCA* expression (42), suggested a possible competition between the two trans-factors. However, miR-153 expression is almost undetectable in HeLa cells (PCR cycle threshold Ct of 33, while U6 control shows

Ct of 22), therefore its participation in  $\alpha$ -synuclein down-regulation upon TIAR depletion is very unlikely to occur in our cellular system. Yet, we cannot exclude that miR-153 could play a role in TIAR regulation in the nervous system.

We then used the multiMiR algorithm (43) to systematically investigate other microRNAs interacting with the long *SNCA* 3'UTR (containing all other 3'UTRs). We collected a total of 142 predicted and 9 experimentally validated microRNAs (MultiMiR score > 0.7) and manually retrieved their binding sites from the microRNA.org server. Using the PhastCons score to measure evolutionary conservation of sequence blocks across multiple vertebrates (44), we separated the microRNAs in two classes: conserved (PhastCons score > 0.57 corresponding to conservation across all mammals) and non-conserved (PhastCons score < 0.57).

We specifically focused on microRNAs having binding sites overlapping with TIAR and ELAVL1 *SNCA* 3'UTR contacts annotated in AURA database (23,24). We found a total of 9 microRNAs co-localizing with ELAVL1 binding regions, but only one of them, miR-539-5p, was found to be conserved. As for TIAR, two non-conserved microRNAs, miR-126-5p and miR-3134, showed contacts overlapping with the binding sites of the protein. We proceeded to test the expression levels of the microRNAs in our HeLa cells by means of a high throughput approach (Supplementary Material). After signal normalization, we found around 432 miRNAs that passed the expression threshold. However, none of those miRNAs overlap with either TIAR or ELAVL1 binding sites. In accordance with this result, an external dataset taken from a published high-throughput small RNA sequencing analysis (45) reveals nearly undetectable levels of expression of candidate microRNAs (Supplementary Table S3).

Overall, our analysis indicates that microRNAs levels of expression are poor in two independent HeLa cell lines, as also directly observed for miR-7 and miR-153 by TaqMan assay. We therefore ruled out that these microRNAs might have a role in TIAR- and ELAVL1-dependent *SNCA* regulation in the cell model used for our functional assays.

### TIAR and ELAVL1 expressions are altered in frontal motor cortex and in primary fibroblasts from patients affected by PD and MSA synucleinopathies

To address implications of TIAR or ELAVL1 in the onset of neurodegeneration, we investigated whether their abundances are altered in conditions associated with changes in  $\alpha$ -synuclein expression: PD and another synucleinopathy, Multiple System Atrophy (MSA). PD and MSA belong to a group of synucleinopathies characterized by abnormal accumulation of  $\alpha$ -synuclein. Differently from PD, where  $\alpha$ -synuclein positive aggregates appear to be largely neuronal, oligodendroglia inclusion prevail in MSA (46,47). The pathogenic mechanisms leading to neurodegeneration in MSA are not well understood, but partially differ from PD since MSA patients show resistance to L-dopa treatment (48,49). In contrast to PD, disease-causative genetic mutations responsible of monogenic forms of MSA have so far not been identified (50–52). Neurodegeneration typically occur with a multisystemic distribution that partially differs from the one observed in PD. For this reason, we de-

cidated to examine the frontal *motor cortex*, which is generally affected with similar degree in both PD and MSA at the late stages (Supplementary Table S1; Material and Methods; Supplementary Materials). We found that TIAR was down-regulated in PD with respect to control individuals with a fold-change of 0.65 ( $P$ -value = 0.09, Wilcoxon's test, Figure 8A and B; four controls, five PD and five MSA cases). No alteration of ELAVL1 expression was observed in PD, while a 1.5-fold increase was measured in MSA when compared to controls ( $P$ -value = 0.15, Wilcoxon's test, Figure 8A–D). The results correlated with  $\alpha$ -synuclein protein expression that was found decreased in PD with respect to controls (fold-change = 0.49,  $P$ -value = 0.15, Wilcoxon's test, Figure 8A–C) and slightly increased in MSA. In agreement with these results, Neystat *et al.* showed reduction of *SNCA* expression in *substantia nigra* of PD affected individuals (53) and another group reported 50% reduction at the cellular level in *substantia nigra* neurons and frontal cortex neurons in PD (54). Also in accordance with our findings, oligodendrocytes isolated from MSA brains expressed elevated levels of *SNCA* compared to control (55) and a recent strand-specific RNA-sequencing analysis of MSA brain transcriptome reported a moderate increase of *SNCA* expression in frontal cortex of MSA patients compared to normal individuals (56).

Analysis of primary cultured fibroblast obtained from human skin biopsies of sporadic PD (sPD), LRRK2-associated PD (L2PD), MSA and healthy control individuals (Supplementary Table S2) revealed that  $\alpha$ -synuclein is also very poorly expressed in the tissue (Supplementary Figure S6A). Nevertheless, we could measure a significant down-regulation of TIAR in PD and MSA patients with respect to control individuals (Supplementary Figure S6A–B). Results were similar when the two PD groups (sPD and L2PD) were analyzed together or separately (Supplementary Figure S6B–D), with the exception of ELAVL1 for which we observed a statistically significant increase specific of the L2PD group (Supplementary Figure S6E).

Overall, our results show an alteration of TIAR and ELAVL1 levels in two different tissues of patients affected by PD or MSA. Due to intra-group variability and small sample size we cannot exclude that the observed changes are due to other causes. Nevertheless, TIAR down-regulation is consistent in both tissues and is accompanied by  $\alpha$ -synuclein decrease in motor cortex, in agreement with our functional assays.

### Trans-expression quantitative trait loci analysis reveals functional association between TIAR and *SNCA*

To investigate if naturally occurring mutations in *SNCA* RNA could affect ELAVL1 and TIAR binding, we downloaded all the single nucleotide polymorphisms (SNPs) annotated in 1000 Genomes (hg19) within the genomic coordinate of the 3'UTR (4:90, 645, 249–90, 647, 778).

The SNPs were ranked using CADD (57) to select functional and deleterious variants based on characteristics such as evolutionary conservation, type of substitution and presence of regulatory elements. The degree of the deleteriousness of SNPs was measured using PHRED (score > 10 indicates significant implication). Out of 67 SNPs, 5 SNPs fall

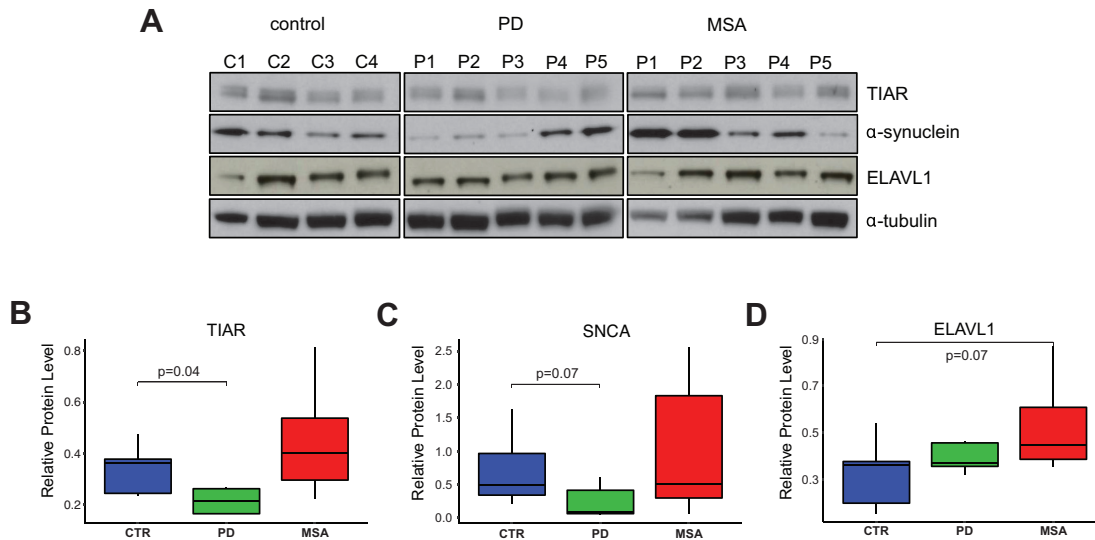

**Figure 8.** TIAR, ELAVL1 and  $\alpha$ -synuclein protein levels in motor cortex *post-mortem* samples. (A)  $\alpha$ -synuclein TIAR and ELAVL1 protein level in motor cortex tissue of *post-mortem* control individuals, PD and MSA patients measured by western blot. Normalized average values of (B) TIAR, (C)  $\alpha$ -synuclein and (D) ELAVL1 in the three groups (Wilcoxon's test *P*-values are reported).

into ELAVL1 binding sites, 3 in TIAR binding sites and 2 are located in ELAVL1/TIAR shared binding regions. 6 of these SNPs overlapping with TIAR/ELAVL1 binding sites have a PHRED score  $>10$ , suggesting possible effect on *SNCA* expression and functionality (Supplementary Table S4).

In addition, we investigated 6 SNPs associated to PD (58) and found that one of them, rs356165, is located in *SNCA* 3'UTR. The other 5 SNPs are in a genomic region  $>20$ KB downstream *SNCA* 3'UTR. These PD-associated SNPs are not highly ranked by CADD (score  $<10$ ), however two of them (rs356182 and rs356219) were detected by other studies as associated to PD (59,60).

As observed in previous reports (61,62), RBPs and target RNAs are expressed in tissue-specific patterns that are altered in pathological conditions. Thus, it is possible that SNPs in *TIAR* and *ELAVL1* loci affect their RBP activities modifying *SNCA* expression. To test this hypothesis, we computed *trans expression Quantitative Trait Loci* (trans-eQTLs) of *TIAR* and *ELAVL1* SNPs in relation to *SNCA* using 10 brain tissues available from GTEx database (Supplementary Materials) (63). Remarkably, *hippocampus* and *nucleus accumbens* basal ganglia showed highly significant *SNCA* trans-eQTL *P*-values ( $<1.9e-4$ ) associated with polymorphisms in *TIAR* locus. The link is particularly evident in *hippocampus*, where polymorphisms rs7912058, rs113562141, rs4751739 and rs4751740 ( $R^2 = 1$ ;  $D' = 1$  between them) located few kilobases downstream *TIAR*, reach a *SNCA* trans-eQTL *P*-value of  $9e-5$ , showing a singularly strong association between the two loci (Figure 9A). In addition, we found that the minor allele of the leading SNP rs7912058-G is associated with decreased expression of *SNCA* (Supplementary Figure S7). Our result is further supported by a trans-eQTLs analysis of 22 818 tag-SNPs from 100 random genes showing low interaction score in our protein array experiments. Indeed, out of 22 818

only three tag-SNPs (rs72983079 in *GNA15*, rs3782119 in *BET1L* and rs116911351 in *C20orf166* gene) achieved significant *P*-values in the order of magnitude of  $e-4$ , which further highlights the strength of the association with *TIAR* (binomial test *P*-value = 0.02).

The SNPs in the trans-eQTLs *TIAR* region (Figure 9A) present the typical pattern of linkage disequilibrium (LD) decay of GWAS association signals, with a dominant SNP surrounded by variants with lower *P*-values. Interestingly, using PLINK algorithm (64), we calculated that our trans-eQTLs are in moderate LD ( $R^2 \sim 0.4$ ;  $D' = 1$ ) with significantly PD-associated SNPs in *TIAR* locus found in a previous work (58) (Figure 9B). Overall, this indicates that the association of *TIAR* with PD might come from its regulatory role in *SNCA* expression. The same genomic region hosts *cis*-eQTLs for *TIAR* locus (rs11199019, rs185650278, rs4636576, rs6585553, rs4752328; tibial nerve tissue) suggesting that this sequence exerts a regulatory role on *TIAR* gene expression.

As for the *ELAVL1* gene, we could not find any significant association with PD, nor significant trans-eQTLs for *SNCA* gene.

## DISCUSSION

In the last twenty years many efforts have been undertaken to study the biochemical features of PD-associated  $\alpha$ -synuclein from aggregation and post-translational modification to turnover and interaction with cellular components (64–66). However, recent studies (5,6) revealed the importance of transcriptional and post-transcriptional regulations in the context of pathology (67). For the first time, we presented here a study on the post-transcriptional regulation of  $\alpha$ -synuclein by RBPs targeting the 3' untranslated region of its mRNA.

Using a large-scale *in vitro* / *in silico* screening, we discovered RBPs interacting with *SNCA* 3' UTR. Two interactors,

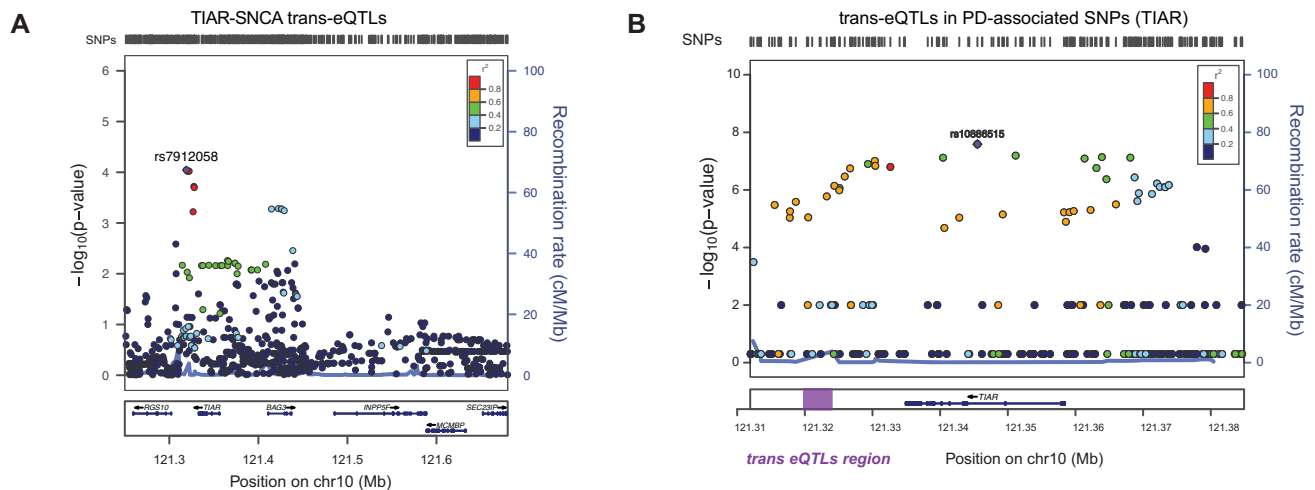

**Figure 9.** *SNCA* trans expression Quantitative Trait Loci (trans-eQTLs) analysis of *TIAR* and *ELAVL1*. (A) *SNCA* trans-eQTLs analysis in the region chr10:121250246–121682830 (hg19) spanning from 84 kb upstream *TIAR* gene to 94 kb downstream neighboring *INPP5F* gene. The analysis, performed using GTEx data available for human *hippocampus* tissue ( $n = 81$ ), shows highly significant *SNCA* trans-eQTLs  $P$ -values ( $P$ -values  $< 10^{-9}$ ) for a group of SNPs downstream *TIAR* gene (red and purple dots). A locus zoom graph shows that the significant *SNCA* trans-eQTLs in *TIAR* region present the typical pattern of linkage disequilibrium (LD) decay of association signals, with a top-associated SNP and other surrounding associated SNPs in progressively decaying LD values ('Recombination rate' on right y-axes). (B) PD-associated SNPs from previous GWAS studies (58) in the genomic region of chromosome 10 including *TIAR* gene. The  $-\log(P$ -value) is represented on the left y-axes, while the 'recombination rate' is represented on the right y-axes. The region downstream *TIAR* locus where significant *SNCA* trans-eQTLs map is highlighted with a purple rectangle.

*ELAVL1* and *TIAR*, bind to different *SNCA* isoforms generated by alternative polyadenylation mechanisms. Among 5 different known transcript isoforms, the one carrying the short 3'UTR (575 bases) was found to be the most abundant in SH-SY5Y and HeLa cells (~50% of total *SNCA* mRNA). Using a gene reporter assay, we observed that the short 3'UTR isoform is more active than longer isoforms (1.07 and 2.5 kb 3'UTR) and highly contributing to protein synthesis *in vivo*. The short 3'UTR contains high-affinity binding sites for both RBPs in a region comprised between 190–575 nt.

Knockdown and overexpression experiments in HeLa cells show that *ELAVL1* and *TIAR* positively regulate endogenous  $\alpha$ -synuclein. The mechanism through which the two RBPs regulate  $\alpha$ -synuclein expression implies mRNA stabilization, as shown by the RNA decay assay, and enhancement of translation in the case of *TIAR*, as demonstrated by polyribosome profiling experiments. This result is compatible with the well-documented role of *ELAVL1* as RNA stabilization factor. Indeed, *ELAVL1* interferes with ARE-dependent mRNA degradation by protecting the body of the mRNA from decay, rather than slowing down mRNA deadenylation (34). While it is generally assumed that *ELAVL1* stabilizes mRNAs primarily by competing with proteins designated to mRNA degradation such as AUF-1, KSRP or TTP (21,68,69), other mechanisms, such as a direct competition with microRNAs or regulation of microRNAs expression, might be involved (70,71). It would be of great interest to investigate the role of microRNAs in *TIAR*- and *ELAVL1*-dependent regulation of *SNCA*. However, our analysis indicates that the level of expression of microRNAs targeting *TIAR* and *ELAVL1* binding sites is poor in two independent HeLa cell lines. We therefore excluded that microRNAs might have any relevant role in

*TIAR* and *ELAVL1* dependent *SNCA* regulation in our functional assays.

As for the effect observed on *SNCA* mRNA translation, our results show that *TIAR* promotes protein production by shifting *SNCA* mRNA towards the high molecular weight polysomal fractions. Although *TIAR* was previously reported as a translational inhibitor in presence of stress conditions by induction of stress granules formation (72), it is possible that it has a dual role in RNA translation. Indeed, as described for other RBPs, many factors contribute to determine the final regulatory effect on target RNAs, from the sequence and structure of binding regions to the availability of interacting partners (18). Further characterization of the molecular complexes formed by *TIAR* and *ELAVL1* will be needed to elucidate the mechanism of regulation of *SNCA*. Notably, *TIAR*, together with other RBPs markers of stress granules, was found in pathological lesions of several neurological conditions, such as Alzheimer disease, prion disease, tauopathies and Huntington disease (73–76). This observation suggests that the aberrant assembly of ribonucleoprotein granules could alter the expression of a number of target genes leading to toxicity (77).

Interestingly, *TIAR* and *ELAVL1* protein levels are altered in *post-mortem* brain tissues from patients affected by PD and MSA. In correlation with  $\alpha$ -synuclein levels, we observed a down-regulation of *TIAR* in PD and an increase of *ELAVL1* in MSA. This result suggests that the two RBPs have a key role in PD and MSA. Indeed, *ELAVL1* was recently shown to play a neuroprotective role in mice hippocampal neurons following strong glutamatergic excitation through the post-transcriptional orchestration of specialized genes involved in mitochondrial dysfunction, oxidative damage and programmed cell death (78). Similarly, *TIAR* was found to target a number of genes associated with inflammation and mitochondrial metabolism, such as



TNF- $\alpha$ , COX-2 and mitochondrial cytochrome C (79–81). In agreement with these observations, a previous study reported significant increase in the level of innate immune components including complement and cytokines (e.g., IL-1, IL-2, IL-6 and TNF) in the *substantia nigra* and CSF of PD patients (82). Moreover, microglial activation was reported to parallel neuronal degeneration in MSA (83) and increased expression of proinflammatory genes was observed in *post-mortem* tissue from the rostral pons of MSA patients (84). Supporting these findings, polymorphisms in proinflammatory genes such as IL-1 $\beta$ , IL-1 $\alpha$  or TNF- $\alpha$  were reported to be associated with increased MSA risk (85,86). Therefore, we speculate that the two RBPs might coordinately regulate the expression of entire sets of genes involved in pathways characteristics of PD and MSA neurodegeneration.

Notably, TIAR and ELAVL1 were identified in a group of 2000 significantly down-regulated genes in a network-based meta-analysis of four independent microarray studies sporadic and LRRK2-associated PD cases (16). Additional indications of TIAR association to PD *via* regulation of  $\alpha$ -synuclein, come from the GWAS and trans-eQTLs analysis on the genomic locus comprising *TIAR* region. Importantly, Nalls et al. (58) found a group of frequent variants in *TIAR* locus with significant association to PD. This finding is in strong agreement with our trans-eQTLs analysis that identifies a group of SNPs in the same genomic locus influencing *SNCA* expression in two different brain areas, *nucleus accumbens* and *hippocampus*.

Fundamental questions about the mechanism through which TIAR- and ELAVL1-mediated regulation of *SNCA* can lead to disease remain to be addressed. To what extent  $\alpha$ -synuclein overexpression caused by the increase of TIAR and ELAVL1 activity can induce protein aggregation and cell toxicity? Is  $\alpha$ -synuclein the only PD-associated target of these two RBPs?

From a more clinical perspective, testing TIAR and ELAVL1 levels in human biospecimen (urine, blood, serum or cerebrospinal fluid) would be of great interest for improving the diagnosis and prognosis of different synucleinopathies. Indeed, distinguishing MSA from PD can be difficult owing to PD-like features in MSA, including occasionally a transient L-dopa response in some patients. Moreover, MSA is characterized by a prognosis of a markedly shorten life span with respect to PD (87,88), so a high level of accuracy in the diagnosis is needed but not yet available (89).

In conclusion, further studies would be needed to obtain deeper insights into the role of TIAR and ELAVL1 in the development of PD and other synucleinopathies, which will help to evaluate the impact of post-transcriptional events on disease.

## SUPPLEMENTARY DATA

Supplementary Data are available at NAR Online.

## ACKNOWLEDGEMENTS

We thank Fátima Gebauer, Juan Valcarcel and Benedetta Bolognesi for interesting discussions and advice. We thank

Silvia Rodríguez, Joana Ribeiro and Iona Gelabert for their technical support. We also thank Diego Garrido and Claudia Giambartolomei for helpful discussion on trans-eQTLs analysis. The authors thank the brain donors and their families for the neurological tissues used in our research.

*Authors contributions:* D.M. and E.B. performed all the experiments. D.C., C.M.L. and J.A.R. performed the computational analysis. R.F.S., M.E. and M.J.M provided clinical samples. D.M., E.B. T.B.O. and G.G.T conceived the hypothesis and designed the experiments. D.M. and G.G.T. wrote the manuscript.

## FUNDING

Spanish Ministry of Economy and Competitiveness, ‘Centro de Excelencia Severo Ochoa 2013–2017’; CERCA Programme / Generalitat de Catalunya; European Research Council [RIBOMYLOME.309545]; Spanish Ministry of Economy and Competitiveness [BFU2014–55054-P]; ‘Fundació La Marató de TV3’ [PI043296]. Funding for open access charge: European Research Council (RIBOMYLOME.309545) Fundació la Marató de TV3 [PI043296].

*Conflict of interest statement.* None declared.

## REFERENCES

- de Lau, L.M.L. and Breteler, M.M.B. (2006) Epidemiology of Parkinson's disease. *Lancet Neurol.*, **5**, 525–535.
- Dauer, W. and Przedborski, S. (2003) Parkinson's disease: mechanisms and models. *Neuron*, **39**, 889–909.
- Spillantini, M.G., Schmidt, M.L., Lee, V.M., Trojanowski, J.Q., Jakes, R. and Goedert, M. (1997) Alpha-synuclein in Lewy bodies. *Nature*, **388**, 839–840.
- Zanzoni, A., Marchese, D., Agostini, F., Bolognesi, B., Cirillo, D., Botta-Orfila, M., Livi, C.M., Rodriguez-Mulero, S. and Tartaglia, G.G. (2013) Principles of self-organization in biological pathways: a hypothesis on the autogenous association of alpha-synuclein. *Nucleic Acids Res.*, **41**, 9987–9998.
- Rhinn, H., Qiang, L., Yamashita, T., Rhee, D., Zolin, A., Vanti, W. and Abeliovich, A. (2012) Alternative  $\alpha$ -synuclein transcript usage as a convergent mechanism in Parkinson's disease pathology. *Nat. Commun.*, **3**, 1084.
- Locascio, J.J., Eberly, S., Liao, Z., Liu, G., Hoising, A.N., Duong, K., Trisini-Lipsanopoulos, A., Dhima, K., Hung, A.Y., Flaherty, A.W. et al. (2015) Association between  $\alpha$ -synuclein blood transcripts and early, neuroimaging-supported Parkinson's disease. *Brain*, **138**, 2659–2671.
- van Raaij, M.E., van Gestel, J., Segers-Nolten, I.M.J., de Leeuw, S.W. and Subramaniam, V. (2008) Concentration dependence of alpha-synuclein fibril length assessed by quantitative atomic force microscopy and statistical-mechanical theory. *Biophys. J.*, **95**, 4871–4878.
- Siprashvili, Z., Webster, D.E., Kretz, M., Johnston, D., Rinn, J.L., Chang, H.Y. and Khavari, P.A. (2012) Identification of proteins binding coding and non-coding human RNAs using protein microarrays. *BMC Genomics*, **13**, 633.
- Sotiriou, S., Gibney, G., Baxevas, A.D. and Nussbaum, R.L. (2009) A single nucleotide polymorphism in the 3'UTR of the *SNCA* gene encoding alpha-synuclein is a new potential susceptibility locus for Parkinson disease. *Neurosci. Lett.*, **461**, 196–201.
- Hämmerle, M., Gutschner, T., Uckelmann, H., Ozgur, S., Fiskin, E., Gross, M., Skawran, B., Geffers, R., Longrich, T., Breuhahn, K. et al. (2013) Posttranscriptional destabilization of the liver-specific long noncoding RNA HULC by the IGF2 mRNA-binding protein 1 (IGF2BP1). *Hepatology*, **58**, 1703–1712.
- Bechara, E.G., Didiot, M.C., Melko, M., Davidovic, L., Bensaid, M., Martin, P., Castets, M., Pogoniec, P., Khandjian, E.W., Moine, H. et al. (2009) A novel function for fragile X mental retardation protein in translational activation. *PLoS Biol.*, **7**, e16.

12. Kretz, M., Siprashvili, Z., Chu, C., Webster, D.E., Zehnder, A., Qu, K., Lee, C.S., Flockhart, R.J., Groff, A.F., Chow, J. *et al.* (2013) Control of somatic tissue differentiation by the long non-coding RNA TINCR. *Nature*, **493**, 231–235.
13. Cirillo, D., Blanco, M., Armaos, A., Buness, A., Avner, P., Guttman, M., Cerase, A. and Tartaglia, G.G. (2016) Quantitative predictions of protein interactions with long noncoding RNAs. *Nat. Methods*, **14**, 5–6.
14. Agostini, F., Zanzoni, A., Klus, P., Marchese, D., Cirillo, D. and Tartaglia, G.G. (2013) catRAPID omics: a web server for large-scale prediction of protein-RNA interactions. *Bioinforma. Oxf. Engl.*, **29**, 2928–2930.
15. Bellucci, M., Agostini, F., Masin, M. and Tartaglia, G.G. (2011) Predicting protein associations with long noncoding RNAs. *Nat. Methods*, **8**, 444–445.
16. Santiago, J.A. and Potashkin, J.A. (2015) Network-based metaanalysis identifies HNF4A and PTBP1 as longitudinally dynamic biomarkers for Parkinson's disease. *Proc. Natl. Acad. Sci. U.S.A.*, **112**, 2257–2262.
17. Cok, S.J., Acton, S.J. and Morrison, A.R. (2003) The proximal region of the 3'-untranslated region of cyclooxygenase-2 is recognized by a multimeric protein complex containing HuR, TIA-1, TIAR, and the heterogeneous nuclear ribonucleoprotein U. *J. Biol. Chem.*, **278**, 36157–36162.
18. Izquierdo, J.M. (2006) Control of the ATP synthase beta subunit expression by RNA-binding proteins TIA-1, TIAR, and HuR. *Biochem. Biophys. Res. Commun.*, **348**, 703–711.
19. Kim, H.S., Wilce, M.C.J., Yoga, Y.M.K., Pendini, N.R., Gunzburg, M.J., Cowieson, N.P., Wilson, G.M., Williams, B.R.G., Gorospe, M. and Wilce, J.A. (2011) Different modes of interaction by TIAR and HuR with target RNA and DNA. *Nucleic Acids Res.*, **39**, 1117–1130.
20. Subramaniam, K., Kandasamy, K., Joseph, K., Spicer, E.K. and Tholanikunnel, B.G. (2011) The 3'-untranslated region length and AU-rich RNA location modulate RNA-protein interaction and translational control of  $\beta$ 2-adrenergic receptor mRNA. *Mol. Cell. Biochem.*, **352**, 125–141.
21. Suswam, E.A., Nabors, L.B., Huang, Y., Yang, X. and King, P.H. (2005) IL-1 $\beta$  induces stabilization of IL-8 mRNA in malignant breast cancer cells via the 3' untranslated region: Involvement of divergent RNA-binding factors HuR, KSRP and TIAR. *Int. J. Cancer*, **113**, 911–919.
22. Wigington, C.P., Jung, J., Rye, E.A., Belauret, S.L., Philpot, A.M., Feng, Y., Santangelo, P.J. and Corbett, A.H. (2015) Post-transcriptional regulation of programmed cell death 4 (PDCD4) mRNA by the RNA-binding proteins human antigen R (HuR) and T-cell intracellular antigen 1 (TIA1). *J. Biol. Chem.*, **290**, 3468–3487.
23. Dassi, E., Malossini, A., Re, A., Mazza, T., Tebaldi, T., Caputi, L. and Quattrone, A. (2012) AURA: Atlas of UTR Regulatory Activity. *Bioinforma. Oxf. Engl.*, **28**, 142–144.
24. Dassi, E., Re, A., Leo, S., Tebaldi, T., Pasini, L., Peroni, D. and Quattrone, A. (2014) AURA 2: Empowering discovery of post-transcriptional networks. *Transl. Austin Tex.*, **2**, e27738.
25. Korecka, J.A., van Kesteren, R.E., Blaas, E., Spitzer, S.O., Kamstra, J.H., Smit, A.B., Swaab, D.F., Verhaagen, J. and Bossers, K. (2013) Phenotypic characterization of retinoic acid differentiated SH-SY5Y cells by transcriptional profiling. *PloS One*, **8**, e63862.
26. Miura, P., Shenker, S., Andreu-Agullo, C., Westholm, J.O. and Lai, E.C. (2013) Widespread and extensive lengthening of 3' UTRs in the mammalian brain. *Genome Res.*, **23**, 812–825.
27. Kishore, S., Jaskiewicz, L., Burger, L., Hausser, J., Khorshid, M. and Zavolan, M. (2011) A quantitative analysis of CLIP methods for identifying binding sites of RNA-binding proteins. *Nat. Methods*, **8**, 559–564.
28. Mukherjee, N., Corcoran, D.L., Nusbaum, J.D., Reid, D.W., Georgiev, S., Hafner, M., Ascano, M., Tuschl, T., Ohler, U. and Keene, J.D. (2011) Integrative regulatory mapping indicates that the RNA-binding protein HuR couples pre-mRNA processing and mRNA stability. *Mol. Cell*, **43**, 327–339.
29. Lebedeva, S., Jens, M., Theil, K., Schwanhäusser, B., Selbach, M., Landthaler, M. and Rajewsky, N. (2011) Transcriptome-wide Analysis of Regulatory Interactions of the RNA-Binding Protein HuR. *Mol. Cell*, **43**, 340–352.
30. Wang, Z., Kayikci, M., Briese, M., Zarnack, K., Luscombe, N.M., Rot, G., Zupan, B., Curk, T. and Ule, J. (2010) iCLIP predicts the dual splicing effects of TIA-RNA interactions. *PLoS Biol.*, **8**, e1000530.
31. Chartier-Harlin, M.-C., Kachergus, J., Roumier, C., Mouroux, V., Douay, X., Lincoln, S., Levecque, C., Larvor, L., Andrieux, J., Hulihan, M. *et al.* (2004) Alpha-synuclein locus duplication as a cause of familial Parkinson's disease. *Lancet Lond. Engl.*, **364**, 1167–1169.
32. Chiba-Falek, O. and Nussbaum, R.L. (2001) Effect of allelic variation at the NACP-Repl repeat upstream of the alpha-synuclein gene (SNCA) on transcription in a cell culture luciferase reporter system. *Hum. Mol. Genet.*, **10**, 3101–3109.
33. Brennan, C.M. and Steitz, J.A. (2001) HuR and mRNA stability. *Cell. Mol. Life Sci. CMLS*, **58**, 266–277.
34. Peng, S.S., Chen, C.Y., Xu, N. and Shyu, A.B. (1998) RNA stabilization by the AU-rich element binding protein, HuR, an ELAV protein. *EMBO J.*, **17**, 3461–3470.
35. Kedersha, N.L., Gupta, M., Li, W., Miller, I. and Anderson, P. (1999) RNA-binding proteins TIA-1 and TIAR link the phosphorylation of eIF-2 alpha to the assembly of mammalian stress granules. *J. Cell Biol.*, **147**, 1431–1442.
36. Mazan-Mamczarz, K., Lal, A., Martindale, J.L., Kawai, T. and Gorospe, M. (2006) Translational repression by RNA-binding protein TIAR. *Mol. Cell. Biol.*, **26**, 2716–2727.
37. Podsywalow-Bartnicka, P., Wolczyk, M., Kusio-Kobialka, M., Wolanin, K., Skowronek, K., Nieborowska-Skorska, M., Dasgupta, Y., Skorski, T. and Piwocka, K. (2014) Downregulation of BCR1 protein in BCR-ABL1 leukemia cells depends on stress-triggered TIAR-mediated suppression of translation. *Cell Cycle Georget. Tex.*, **13**, 3727–3741.
38. Schneider, C.A., Rasband, W.S. and Eliceiri, K.W. (2012) NIH Image to ImageJ: 25 years of image analysis. *Nat. Methods*, **9**, 671–675.
39. Xu, F., Zhang, X., Lei, Y., Liu, X., Liu, Z., Tong, T. and Wang, W. (2010) Loss of repression of HuR translation by miR-16 may be responsible for the elevation of HuR in human breast carcinoma. *J. Cell. Biochem.*, **111**, 727–734.
40. Choudhury, N.R., de Lima Alves, F., de Andrés-Aguayo, L., Graf, T., Cáceres, J.F., Rappsilber, J. and Michlewski, G. (2013) Tissue-specific control of brain-enriched miR-7 biogenesis. *Genes Dev.*, **27**, 24–38.
41. Junn, E., Lee, K.-W., Jeong, B.S., Chan, T.W., Im, J.-Y. and Mouradian, M.M. (2009) Repression of alpha-synuclein expression and toxicity by microRNA-7. *Proc. Natl. Acad. Sci. U.S.A.*, **106**, 13052–13057.
42. Doxakis, E. (2010) Post-transcriptional regulation of alpha-synuclein expression by mir-7 and mir-153. *J. Biol. Chem.*, **285**, 12726–12734.
43. Ru, Y., Kechris, K.J., Tabakoff, B., Hoffman, P., Radcliffe, R.A., Bowler, R., Mahaffey, S., Rossi, S., Calin, G.A. *et al.* (2014) The multiMiR R package and database: integration of microRNA-target interactions along with their disease and drug associations. *Nucleic Acids Res.*, **42**, e133–e133.
44. Siepel, A., Bejerano, G., Pedersen, J.S., Hinrichs, A.S., Hou, M., Rosenbloom, K., Clawson, H., Spieth, J., Hillier, L.W., Richards, S. *et al.* (2005) Evolutionarily conserved elements in vertebrate, insect, worm, and yeast genomes. *Genome Res.*, **15**, 1034–1050.
45. Grolmusz, V.K., Tóth, E.A., Baghy, K., Likó, I., Darvasi, O., Kovalszky, I., Matkó, J., Rácz, K. and Patócs, A. (2016) Fluorescence activated cell sorting followed by small RNA sequencing reveals stable microRNA expression during cell cycle progression. *BMC Genomics*, **17**, 412.
46. Cykowski, M.D., Coon, E.A., Powell, S.Z., Jenkins, S.M., Benarroch, E.E., Low, P.A., Schmeichel, A.M. and Parisi, J.E. (2015) Expanding the spectrum of neuronal pathology in multiple system atrophy. *Brain J. Neurol.*, **138**, 2293–2309.
47. Halliday, G.M., Holton, J.L., Revesz, T. and Dickson, D.W. (2011) Neuropathology underlying clinical variability in patients with synucleinopathies. *Acta Neuropathol. (Berl.)*, **122**, 187–204.
48. Churtyard, A., Donnan, G.A., Hughes, A., Howells, D.W., Woodhouse, D., Wong, J.Y., Kalnins, R.M., Mendelsohn, F.A. and Paxinos, G. (1993) Dopa resistance in multiple-system atrophy: loss of postsynaptic D2 receptors. *Ann. Neurol.*, **34**, 219–226.
49. Wenning, G.K., Ben Shlomo, Y., Magalhães, M., Daniel, S.E. and Quinn, N.P. (1994) Clinical features and natural history of multiple system atrophy. An analysis of 100 cases. *Brain J. Neurol.*, **117**, 835–845.

50. Al-Chalabi, A., Dürr, A., Wood, N.W., Parkinson, M.H., Camuzat, A., Hult, J.-S., Morrison, K.E., Renton, A., Sussmuth, S.D., Landwehrmeyer, B.G. *et al.* (2009) Genetic variants of the alpha-synuclein gene SNCA are associated with multiple system atrophy. *PLoS One*, **4**, e7114.
51. Houlden, H., Bettencourt, C. and Chelban, V. (2016) Updates on potential therapeutic targets in MSA. *ACNR*, **15**:8–11.
52. Scholz, S.W., Houlden, H., Schulte, C., Sharma, M., Li, A., Berg, D., Melchers, A., Paudel, R., Gibbs, J.R., Simon-Sanchez, J. *et al.* (2009) SNCA variants are associated with increased risk for multiple system atrophy. *Ann. Neurol.*, **65**, 610–614.
53. Neystat, M., Lynch, T., Przedborski, S., Kholodilov, N., Rzhetskaya, M. and Burke, R.E. (1999) Alpha-synuclein expression in substantia nigra and cortex in Parkinson's disease. *Mov. Disord. Off. J. Mov. Disord. Soc.*, **14**, 417–422.
54. Kingsbury, A.E., Daniel, S.E., Sangha, H., Eisen, S., Lees, A.J. and Foster, O.J.F. (2004) Alteration in alpha-synuclein mRNA expression in Parkinson's disease. *Mov. Disord. Off. J. Mov. Disord. Soc.*, **19**, 162–170.
55. Asi, Y.T., Simpson, J.E., Heath, P.R., Wharton, S.B., Lees, A.J., Revesz, T., Houlden, H. and Holton, J.L. (2014) Alpha-synuclein mRNA expression in oligodendrocytes in MSA. *Glia*, **62**, 964–970.
56. Mills, J.D., Ward, M., Kim, W.S., Halliday, G.M. and Janitz, M. (2016) Strand-specific RNA-sequencing analysis of multiple system atrophy brain transcriptome. *Neuroscience*, **322**, 234–250.
57. Kircher, M., Witten, D.M., Jain, P., O'Roak, B.J., Cooper, G.M. and Shendure, J. (2014) A general framework for estimating the relative pathogenicity of human genetic variants. *Nat. Genet.*, **46**, 310–315.
58. Nalls, M.A., Pankratz, N., Lill, C.M., Do, C.B., Hernandez, D.G., Saad, M., DeStefano, A.L., Kara, E., Bras, J., Sharma, M. *et al.* (2014) Large-scale meta-analysis of genome-wide association data identifies six new risk loci for Parkinson's disease. *Nat. Genet.*, **46**, 989–993.
59. Pickrell, J.K., Berisa, T., Liu, J.Z., Séguire, L., Tung, J.Y. and Hinds, D.A. (2016) Detection and interpretation of shared genetic influences on 42 human traits. *Nat. Genet.*, **48**, 709–717.
60. Lill, C.M., Roehr, J.T., McQueen, M.B., Kavvoura, F.K., Bagade, S., Schjeide, B.-M.M., Schjeide, L.M., Meissner, E., Zauf, U., Allen, N.C. *et al.* (2012) Comprehensive Research Synopsis and Systematic Meta-Analyses in Parkinson's Disease Genetics: the PDGene Database. *PLoS Genet.*, **8**, e1002548.
61. Cirillo, D., Marchese, D., Agostini, F., Livi, C.M., Botta-Orfila, T. and Tartaglia, G.G. (2014) Constitutive patterns of gene expression regulated by RNA-binding proteins. *Genome Biol.*, **15**, R13.
62. Cirillo, D., Livi, C.M., Agostini, F. and Tartaglia, G.G. (2014) Discovery of protein-RNA networks. *Mol. Biosyst.*, **10**, 1632–1642.
63. GTEx Consortium (2013) The Genotype-Tissue Expression (GTEx) project. *Nat. Genet.*, **45**, 580–585.
64. Purcell, S., Neale, B., Todd-Brown, K., Thomas, L., Ferreira, M.A.R., Bender, D., Maller, J., Sklar, P., de Bakker, P.I.W., Daly, M.J. *et al.* (2007) PLINK: a tool set for whole-genome association and population-based linkage analyses. *Am. J. Hum. Genet.*, **81**, 559–575.
65. Lautenschläger, J., Kaminski, C.F. and Kaminski Schierle, G.S. (2017)  $\alpha$ -Synuclein - Regulator of Exocytosis, Endocytosis, or Both? *Trends Cell Biol.*, **27**, 468–479.
66. Wong, Y.C. and Krainc, D. (2017)  $\alpha$ -synuclein toxicity in neurodegeneration: mechanism and therapeutic strategies. *Nat. Med.*, **23**, 1–13.
67. Rocha, E.M., De Miranda, B. and Sanders, L.H. (2017) Alpha-synuclein: pathology, mitochondrial dysfunction and neuroinflammation in Parkinson's disease. *Neurobiol. Dis.*, doi:10.1016/j.nbd.2017.04.004.
68. Cok, S.J., Acton, S.J., Sexton, A.E. and Morrison, A.R. (2004) Identification of RNA-binding proteins in RAW 264.7 cells that recognize a lipopolysaccharide-responsive element in the 3'-untranslated region of the murine cyclooxygenase-2 mRNA. *J. Biol. Chem.*, **279**, 8196–8205.
69. Dai, W., Zhang, G. and Makeyev, E.V. (2012) RNA-binding protein HuR autoregulates its expression by promoting alternative polyadenylation site usage. *Nucleic Acids Res.*, **40**, 787–800.
70. Lu, Y.-C., Chang, S.-H., Hafner, M., Li, X., Tuschl, T., Elemento, O. and Hla, T. (2014) ELAVL1 modulates transcriptome-wide miRNA binding in murine macrophages. *Cell Rep.*, **9**, 2330–2343.
71. Srikantan, S., Tominaga, K. and Gorospe, M. (2012) Functional interplay between RNA-binding protein HuR and microRNAs. *Curr. Protein Pept. Sci.*, **13**, 372–379.
72. Wolozin, B. (2012) Regulated protein aggregation: stress granules and neurodegeneration. *Mol. Neurodegener.*, **7**, 56.
73. Ash, P.E.A., Vanderweyde, T.E., Youmans, K.L., Apicco, D.J. and Wolozin, B. (2014) Pathological stress granules in Alzheimer's disease. *Brain Res.*, **1584**, 52–58.
74. Goggin, K., Beaudoin, S., Grenier, C., Brown, A.-A. and Roucou, X. (2008) Prion protein aggregates are poly(A)+ ribonucleoprotein complexes that induce a PKR-mediated deficient cell stress response. *Biochim. Biophys. Acta*, **1783**, 479–491.
75. Vanderweyde, T., Apicco, D.J., Youmans-Kidder, K., Ash, P.E.A., Cook, C., Lummertz da Rocha, E., Jansen-West, K., Frame, A.A., Citro, A., Leszyk, J.D. *et al.* (2016) Interaction of tau with the RNA-Binding Protein TIA1 Regulates tau Pathophysiology and Toxicity. *Cell Rep.*, **15**, 1455–1466.
76. Waelter, S., Boeddrich, A., Lurz, R., Scherzinger, E., Lueder, G., Lehrach, H. and Wanker, E.E. (2001) Accumulation of mutant huntingtin fragments in aggresome-like inclusion bodies as a result of insufficient protein degradation. *Mol. Biol. Cell*, **12**, 1393–1407.
77. Bolognesi, B., Lorenzo Gotor, N., Dhar, R., Cirillo, D., Baldrighi, M., Tartaglia, G.G. and Lehner, B. (2016) A Concentration-Dependent Liquid Phase Separation Can Cause Toxicity upon Increased Protein Expression. *Cell Rep.*, **16**, 222–231.
78. Skliris, A., Papadaki, O., Kafasla, P., Karakasiliotis, I., Hazapis, O., Reczko, M., Grammenoudi, S., Bauer, J. and Kontoyiannis, D.L. (2015) Neuroprotection requires the functions of the RNA-binding protein HuR. *Cell Death Differ.*, **22**, 703–718.
79. Gueydan, C., Droogmans, L., Chalou, P., Huez, G., Caput, D. and Kruys, V. (1999) Identification of TIAR as a protein binding to the translational regulatory AU-rich element of tumor necrosis factor alpha mRNA. *J. Biol. Chem.*, **274**, 2322–2326.
80. Dixon, D.A., Balch, G.C., Kedersha, N., Anderson, P., Zimmerman, G.A., Beauchamp, R.D. and Prescott, S.M. (2003) Regulation of cyclooxygenase-2 expression by the translational silencer TIA-1. *J. Exp. Med.*, **198**, 475–481.
81. Kawai, T., Lal, A., Yang, X., Galban, S., Mazan-Mamczarz, K. and Gorospe, M. (2006) Translational control of cytochrome c by RNA-binding proteins TIA-1 and HuR. *Mol. Cell Biol.*, **26**, 3295–3307.
82. Liu, B. and Hong, J.-S. (2003) Role of microglia in inflammation-mediated neurodegenerative diseases: mechanisms and strategies for therapeutic intervention. *J. Pharmacol. Exp. Ther.*, **304**, 1–7.
83. Ishizawa, K., Komori, T., Sasaki, S., Arai, N., Mizutani, T. and Hirose, T. (2004) Microglial activation parallels system degeneration in multiple system atrophy. *J. Neuropathol. Exp. Neurol.*, **63**, 43–52.
84. Langerveld, A.J., Mihalko, D., DeLong, C., Walburn, J. and Ide, C.F. (2007) Gene expression changes in postmortem tissue from the rostral pons of multiple system atrophy patients. *Mov. Disord. Off. J. Mov. Disord. Soc.*, **22**, 766–777.
85. Infante, J., Llorca, J., Berciano, J. and Combarros, O. (2005) Interleukin-8, intercellular adhesion molecule-1 and tumour necrosis factor-alpha gene polymorphisms and the risk for multiple system atrophy. *J. Neurol. Sci.*, **228**, 11–13.
86. Nishimura, M., Kawakami, H., Komure, O., Maruyama, H., Morino, H., Izumi, Y., Nakamura, S., Kaji, R. and Kuno, S. (2002) Contribution of the interleukin-1beta gene polymorphism in multiple system atrophy. *Mov. Disord. Off. J. Mov. Disord. Soc.*, **17**, 808–811.
87. Jecmenica-Lukic, M., Poewe, W., Tolosa, E. and Wenning, G.K. (2012) Premotor signs and symptoms of multiple system atrophy. *Lancet Neurol.*, **11**, 361–368.
88. Petrovic, I.N., Ling, H., Asi, Y., Ahmed, Z., Kukkle, P.L., Hazrati, L.-N., Lang, A.E., Revesz, T., Holton, J.L. and Lees, A.J. (2012) Multiple system atrophy-parkinsonism with slow progression and prolonged survival: a diagnostic catch. *Mov. Disord. Off. J. Mov. Disord. Soc.*, **27**, 1186–1190.
89. Compta, Y., Giraldo, D.M., Munoz, E., Antonelli, F., Fernandez, M., Bravo, P., Soto, M., Camara, A., Ferran, T., Martí, M.J. and on behalf of Catalan MSA Registry (CMSAR) (2017) Cerebrospinal fluid levels of coenzyme Q10 are reduced in multiple system atrophy. *Parkinsonism and Related Disorders*, doi:10.1016/j.parkreldis.2017.10.010.



## APPENDIX

### MEMBERS OF THE CMSAR

- Asunción Ávila (MD; PhD)<sup>2</sup>, Àngels Bayés (MD; PhD)<sup>3</sup>, Teresa Botta-Orfila (PhD)<sup>4</sup>, Núria Caballol (MD)<sup>5</sup>, Matilde Calopa (MD)<sup>6</sup>, Jaume Campdelacreu (MD; PhD)<sup>6</sup>, Yaroslau Compta (MD; PhD)<sup>1</sup>, Mario Ezquerro (PhD)<sup>1</sup>, Oriol de Fàbregues (MD; PhD)<sup>7</sup>, Rubén Fernández-Santiago (PhD)<sup>1</sup>, Darly Girado (PhD)<sup>1</sup>, Jorge Hernández-Vara (MD; PhD)<sup>7</sup>, Serge Jaumà (MD)<sup>6</sup>, Domenica Marchese (PhD)<sup>4</sup>, Maria J. Martí (MD; PhD)<sup>1</sup>, Javier Pagonabarraga (MD; PhD)<sup>8</sup>, Pau Pastor (MD; PhD)<sup>9</sup>, Lluís Planellas (MD)<sup>1</sup>, Claustre Pont-Sunyer (MD; PhD)<sup>10</sup>, Víctor Puente (MD)<sup>11</sup>, Montserrat Pujol (MD)<sup>12</sup>, Josep Saura (PhD)<sup>13</sup>, Gian Gaetano Tartaglia (PhD)<sup>4</sup>, Eduard Tolosa (MD; PhD)<sup>1</sup>, Francesc Valldeoriola (MD; PhD)<sup>1</sup>
1. Parkinson's disease and Movement Disorders Unit, Neurology Service, ICN, Hospital Clínic, IDIBAPS, CIBERNED, University of Barcelona, Barcelona, Catalonia, Spain
  2. Neurology Service Hospital General de l'Hospitalet, Consorci Sanitari Integral, L'Hospitalet de Llobregat, Barcelona, Catalonia, Spain
  3. Parkinson's disease and Movement Disorders Unit, Clínica Teknon, Barcelona, Catalonia, Spain
  4. Gene function and evolution group; Centre for genomic regulation (CRG), Institutio Catalana de Recerca i Estudis Avançats (ICREA) Universitat Pompeu Fabra (UPF), Barcelona, Catalonia, Spain
  5. Department of Neurology, Hospital Sant Joan Despí Moisès Broggi.Consorci Sanitari Integral, Barcelona, Catalonia, Spain
  6. Parkinson's disease and Movement Disorders Unit, Neurology Service, Hospital de Bellvitge, Hospitalet de Llobregat, Catalonia, Spain
  7. Parkinson's disease and Movement Disorders Unit, Neurology Service, Hospital del Vall d'Hebron, Barcelona, Catalonia, Spain
  8. Parkinson's disease and movement disorders unit. Neurology Service. Hospital de la Creu i Sant Pau, Barcelona, Catalonia, Spain
  9. Neurology Service, Hospital Mútua de Terrassa, Terrassa, Catalonia, Spain
  10. Neurology Service, Hospital General de Granollers, Catalonia, Spain
  11. Neurology Service, Hospital del Mar, Barcelona, Catalonia, Spain
  12. Neurologia Service, Hospital de Santa Maria, Lleida, Catalonia, Spain Biochemistry and Molecular Biology Unit, School of Medicine, Neuroradiology Section, Magnetic Resonance Unit, Centre de IDIBAPS, University of Barcelona, Barcelona, Catalonia, Spain
